1 **Probing the Subcellular Distribution of Phosphatidylinositol Reveals a**  
2 **Surprising Lack at the Plasma Membrane**

3

4 James P. Zewe, April Miller, Sahana Sangappa, Rachel C. Wills, Brady D. Goulden\*  
5 and Gerald R. V. Hammond

6

7 Department of Cell Biology, University of Pittsburgh School of Medicine, Pittsburgh, PA, USA.

8 \*current address: Department of Cell Biology, Johns Hopkins University School of Medicine,  
9 Baltimore, MD, USA.

10

11 **Running Title:** Subcellular distribution of PI

12 **Keywords:** PtdIns; Lipids; Phospholipids;

13 34,312 characters.

14 **Summary.** Zewe et al develop approaches to map the subcellular distribution of the major  
15 phospholipid, phosphatidylinositol (PI), revealing that the lipid is present in most membranes  
16 except for plasma membrane, where it is mainly found as PI4P and PI(4,5)P<sub>2</sub>.

## 1 **Abstract**

2 The polyphosphoinositides (PPIn) are central regulatory lipids that direct membrane function in  
3 eukaryotic cells. Understanding how their synthesis is regulated is crucial to revealing these  
4 lipids' role in health and disease. PPIn are derived from the major structural lipid,  
5 phosphatidylinositol (PI). However, although the distribution of most PPIn have been  
6 characterized, the subcellular localization of PI available for PPIn synthesis is not known. Here,  
7 we have used several orthogonal approaches to map the subcellular distribution of PI, including  
8 localizing exogenous fluorescent PI, as well as detecting lipid conversion products of  
9 endogenous PI after acute chemogenetic activation of PI-specific phospholipase and 4-kinase.  
10 We report that PI is broadly distributed throughout intracellular membrane compartments.  
11 However, there is a surprising lack of PI in the plasma membrane compared to the PPIn. These  
12 experiments implicate regulation of PI supply to the plasma membrane, as opposed to  
13 regulation of PPIn-kinases, as crucial to the control of PPIn synthesis and function at the PM.

## 1 Introduction

2 The polyphosphoinositides (PPIn) are crucial regulatory lipids in eukaryotic physiology. They  
3 direct protein localization and/or activation on the cytosolic face of membranes, thereby  
4 controlling myriad cellular processes such as membrane traffic, lipid exchange, ion transport,  
5 cell signaling and cytoskeletal dynamics (Balla, 2013; Dickson and Hille, 2019). Structurally,  
6 PPIn consist of phosphorylated derivatives of the major glycerophospholipid,  
7 phosphatidylinositol (PI). The enzymology of PPIn synthesis and turnover is well understood,  
8 and an important endeavor in cell biology seeks to understand the control of cellular physiology  
9 in both health and disease by understanding regulation of PPIn enzymes.

10 When considering their relative abundance, the PPIn have an outsized role in membrane  
11 function; they account for only ~2-10% of inositol lipid, with the remainder being PI (Anderson et  
12 al., 2013; Traynor-Kaplan et al., 2017). PI itself accounts for around 10% of total phospholipid  
13 (Vance, 2015), so it follows that PPIn constitute less than 1% of total phospholipid. On the other  
14 hand, PI is an important structural component of membranes, and its synthesis probably  
15 accounts for positive effects of dietary inositol supplementation, as opposed to effects on  
16 quantitatively minor PPIn (Michell, 2018).

17 PI is synthesized on the cytosolic face of the ER (Bochud and Conzelmann, 2015), from where  
18 some is “flopped” to the luminal leaflet for the synthesis of glycosylphosphatidylinositol-linked  
19 proteins (Vishwakarma et al., 2005). The remaining PI has been shown to be distributed fairly  
20 evenly across most organelle membranes by sub-cellular fractionation (Vance, 2015). However,  
21 in such studies, the fraction of PI in the cytosolic face of the membrane (and thus available for  
22 PPIn synthesis) is not known. Furthermore, the process of sub-cellular fractionation exposes  
23 membranes to phosphatases than can remove labile PPIn phosphate monoesters,  
24 consequently overestimating PI and underestimating PPIn. Therefore, it is currently unclear how  
25 much PI is available for PPIn synthesis in cytosolic membrane leaflets – and hence, whether the  
26 crucial regulatory step is the control of PI kinases activity, or supply of PI substrate.

27 A prominent example of this problem is at the plasma membrane (PM), which contains the  
28 majority of PI(4,5)P<sub>2</sub> and largest share of PI4P (Hammond and Balla, 2015). Although these  
29 lipids are ≤ 1% of total cellular phospholipid, they are specifically enriched at the PM, whereas  
30 the much more abundant PI is not; so PPIn likely account for a larger share of the PM inositol

1 lipid. How big a share? Estimates of the fraction of cellular phospholipids at the PM vary by two  
2 orders of magnitude, from 0.5% (Schmick et al., 2014) to 50% (Lange et al., 1989); assuming an  
3 intermediate fraction of 14% (Griffiths et al., 1989), PI(4,5)P<sub>2</sub> and PI4P may therefore be around  
4 ~7% of PM phospholipid, not far from the roughly 10% PI assumed if it were uniformly  
5 distributed among organelles including the PM. This fits with measurements of red blood cells,  
6 which only contain PM, where PI, PI4P and PI(4,5)P<sub>2</sub> are present in approximately equal  
7 quantities (Ferrell and Huestis, 1984). It also fits with observations from isolated cardiomyocyte  
8 PM, which has a limited supply of PI for PPIn re-synthesis after stimulation of phospholipase C  
9 (Nasuhoglu et al., 2002). In general though, there is scant evidence as to the relative  
10 abundance of PI in various organelles that is actually available for PPIn synthesis.

11 In this study, we have applied a series of distinct approaches to map the subcellular distribution  
12 of PI in intact, living cells. These included loading cells with fluorescent PI derivatives, and  
13 probing cells for diacylglycerol (DAG) and PI4P after inducing acute conversion of endogenous  
14 PI to these lipids. Whilst each approach carries significant caveats, collectively our results  
15 illustrate a wide subcellular distribution of PI, but a surprising lack at the PM.



## 1 Results

### 2 *Intracellular distribution of exogenous fluorescent PI.*

3 Lipids with fluorescent fatty acids have long been used as tracers for the traffic, metabolism and  
4 steady-state distribution of native lipids (Lipsky and Pagano, 1985; Struck and Pagano, 1980).  
5 In these experiments, exogenous lipids are applied to cells as either liposomes or via serum  
6 albumin carriers, from where they spontaneously incorporate into the exoplasmic leaflet of the  
7 PM. From here, the lipids follow the same cellular fate as the native molecules: they are either  
8 endocytosed, or else be flipped by native translocases. The flipped lipids may then traffic from  
9 the cytosolic leaflet of the PM to other organelles via vesicular and non-vesicular pathways,  
10 being metabolized along the way (Pagano et al., 1983). We attempted this approach with  
11 inositol lipids, using commercially available TopFluor®-fatty acid conjugated lipids. We reasoned  
12 this was a potentially viable approach, since native PI translocase and/or scramblase activities  
13 have been reported in mammalian cells, albeit with weaker activity compared to  
14 aminophospholipid translocases (Bütikofer et al., 1990; Wang et al., 2018).

15 We loaded COS-7 green monkey fibroblasts with TopFluor lipids using bovine serum albumin  
16 (BSA) for fifteen minutes before back-extracting the outer PM leaflet with excess BSA (figure  
17 1A). As a positive control, we loaded cells with TopFluor-PS. This lipid rapidly incorporated into  
18 the PM and intracellular vesicles (figure 1A, top panel). It could not be back-extracted, since the  
19 PS is rapidly flipped to the inner leaflet by endogenous aminophospholipid translocases (figure  
20 1A), exactly as described previously (Kay et al., 2012). On the other hand, TopFluor-PI(4,5)P<sub>2</sub>  
21 intensely labelled the plasma membrane, but was almost entirely back-extracted, leaving only  
22 punctate signal that presumably corresponded to endocytosed lipid in the exoplasmic leaflet  
23 (figure 1A, middle panel). The majority of TopFluor-PI was also back-extracted from the PM.  
24 However, in addition to the internalized vesicles, a substantial intracellular labelling appeared  
25 during loading that remained after back-extraction (figure 1A, bottom panel). This suggested  
26 that PI was indeed flipped into the inner PM leaflet, but in contrast to PS, was subsequently  
27 transported rapidly to other organelles.

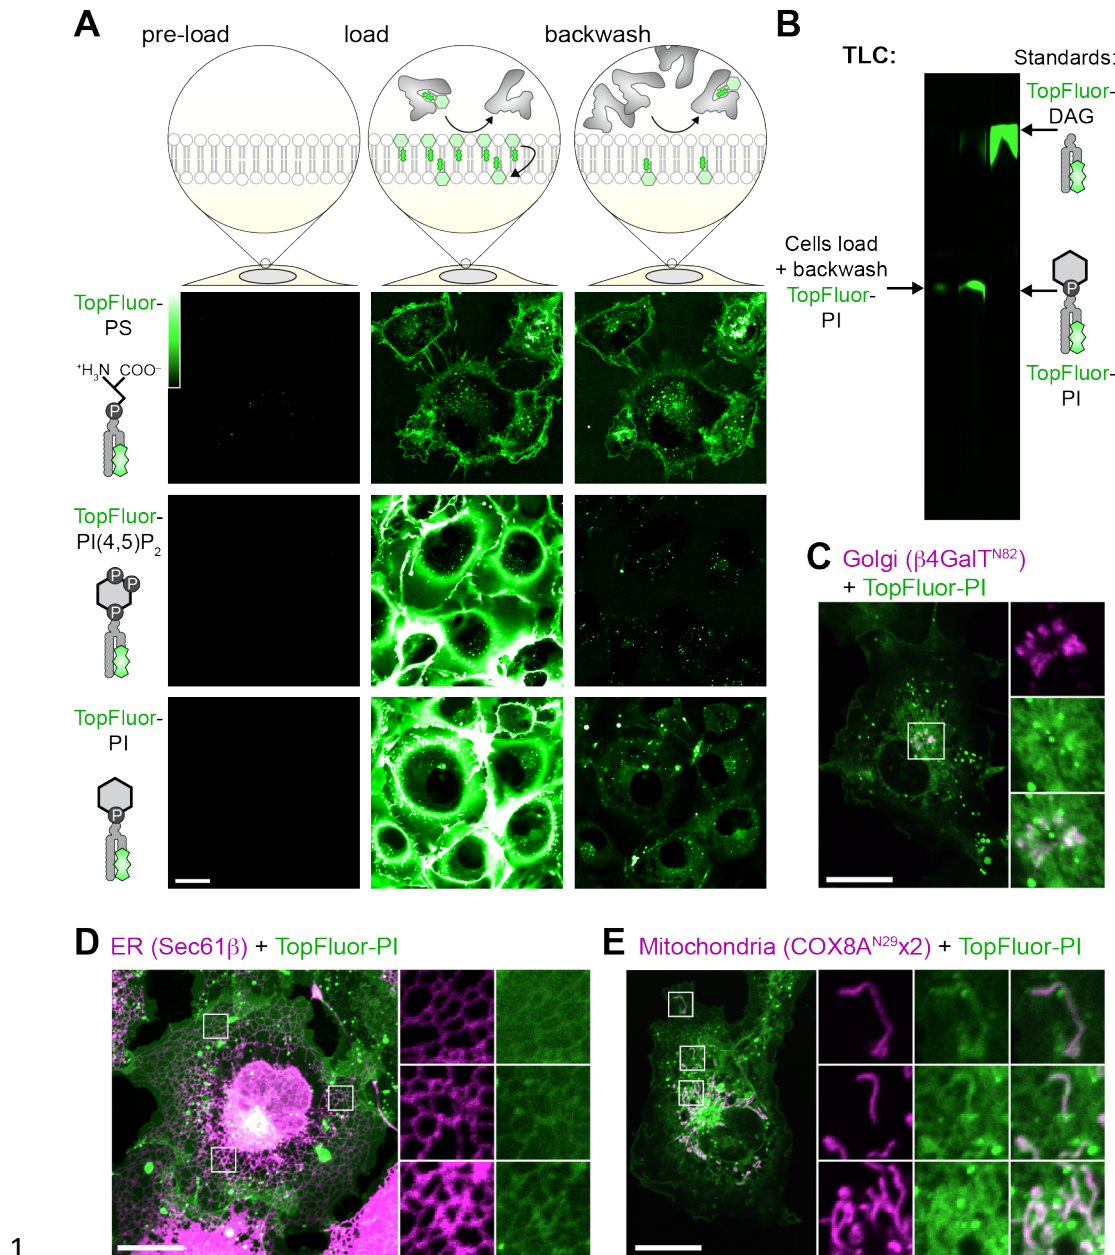

1  
2 **Figure 1: Fluorescent PI is not enriched at the PM.** (A) Internalization of fluorescent lipids. COS-7 cells were  
3 loaded at 37°C with the indicated acyl-conjugated TopFluor lipids complexed with BSA. After 15 min, a 20-fold excess  
4 of un-complexed BSA was used to back-extract lipid remaining in the outer PM leaflet. (B) **Loaded TopFluor-PI is**  
5 **not metabolized.** COS-7 cells were loaded or loaded and back-extracted as in A. Lipids were then extracted and  
6 resolved by thin-layer chromatography. (C-E) **Loaded TopFluor-PI labels the Golgi (C), ER (D) and mitochondria**  
7 (E). COS-7 cells that had been transfected with mCherry- $\beta 4\text{-GalT}^{\text{N82}}$  (C), iRFP-Sec61 $\beta$  (D) or COX8A<sup>N19x2</sup>-mCherry  
8 (E) were loaded and back-extracted as in (A). Scale bar = 20  $\mu\text{m}$  in all panels; insets are 10.9  $\mu\text{m}$  (C) or 7.3  $\mu\text{m}$  (D-  
9 E). Data are representative of three or more experiments.

1 Previous work has shown a similar, though much more rapid, translocation of NBD-labelled PI  
2 from the cell surface to intracellular membranes in 3T3 pre-adipocytes, though not in Chinese  
3 hamster ovary cells (Ting and Pagano, 1990). That rapid translocation was due to an  
4 exoplasmic phospholipase C activity in 3T3 cells that cleaved PI into the rapidly flip-flopping  
5 lipid, DAG. Therefore, we extracted lipids from our COS-7 cells loaded with TopFluor-PI after  
6 back extraction for analysis by thin-layer chromatography: we observed no such metabolism of  
7 PI, which migrated identically to the TopFluor-PI standard and was well resolved from TopFluor-  
8 DAG (figure 1B). Thus, COS-7 cells appeared to traffic exogenous fluorescent PI molecules  
9 from the PM and distribute it to intracellular membranes intact.

10 To identify these intracellular membranes, we performed high-resolution confocal microscopy of  
11 live cells expressing fluorescent protein conjugated markers of the most abundant intracellular  
12 membranes. With this approach, we could detect clear enrichment of the lipid at Golgi  
13 membranes (figure 1C), the endoplasmic reticulum (ER; figure 1D) and mitochondria (figure  
14 1E). Surprisingly, relatively little TopFluor-PI was observed at the PM, in stark contrast to the  
15 observations with TopFluor-PS (figure 1A). To the extent that TopFluor-PI traffic and steady-  
16 state distribution mirrors natural PI, this implies that PI is widely distributed in the cell, though  
17 notably absent from the PM, one of the most active compartments of phosphoinositide  
18 metabolism and function. However, these experiments still bear the significant caveat that the  
19 exogenous, derivatized PI may not reflect the endogenous distribution and traffic of native PI.  
20 They also do not furnish information on the transbilayer distribution of these lipids within the  
21 labelled organelles. For these reasons, we next turned our attention to approaches that could  
22 probe for the presence of endogenous PI in the cytoplasmic face of organelle membranes.

### 23 *An acutely activatable PI-PLC to probe organelle PI content*

24 In lieu of a bona fide PI biosensor for use in living cells, the PI-specific PLC from *Listeria*  
25 *monocytogenes* can be used as an indirect probe: the PI-PLC converts PI to inositol phosphate  
26 and DAG, the latter of which can then be detected with the selective, high affinity C1ab domain  
27 from PKD1 (Kim et al., 2011). The PI-PLC retains high activity despite its largely cytosolic  
28 localization, revealing highly dynamic DAG-containing structures that are not easily attributable  
29 to specific organelles of origin. However, prolonged exposure of cells to a degradative enzyme  
30 like a phospholipase risks extensive damage to membranes and activation of containment and  
31 repair processes. In other words, the DAG distribution may not closely reflect the intracellular

1 origin of the PI, which may have been generated several hours before imaging in these  
2 transfection experiments (Kim et al., 2011).

3 To circumvent this problem, we attempted to make an acutely activatable PI-PLC. Recruitment  
4 of lipid-modifying enzymes to membranes is one commonly used approach to accomplish this  
5 (DeRose et al., 2013), but the high basal activity of cytoplasmic PI-PLC (Kim et al., 2011)  
6 precluded this approach. We attempted to make mutants of *Bacillus cereus* PI-PLC with  
7 reduced (but not abolished) catalytic activity based on previously reported activity of the  
8 recombinant enzyme (Gässler et al., 1997). However, none of the mutants we screened  
9 retained sufficient activity to yield DAG production upon recruitment, whilst also showing low  
10 basal activity before recruitment. We also attempted to incorporate caged lysine into the *L.*  
11 *monocytogenes* enzyme using unnatural amino acids (Courtney and Deiters, 2018), though  
12 were unable to obtain expression of the mutated enzyme.

13 Finally, on inspecting the crystal structure of the *L. monocytogenes* enzyme, we noted that the  
14 protein consists of two well-defined amino and carboxy-terminal lobes with a single linking loop,  
15 and also possessed amino and carboxy termini that were close to one another (Moser et al.,  
16 1997). We therefore reasoned that the enzyme could be expressed as separate lobes that could  
17 be induced to form a functional enzyme after chemically-induced dimerization of FKBP (FK506-  
18 binding protein) and FRB (FKBP12 and Rapamycin binding domain of mTor) fused to the amino  
19 and carboxy terminal domains, respectively (figure 2A).

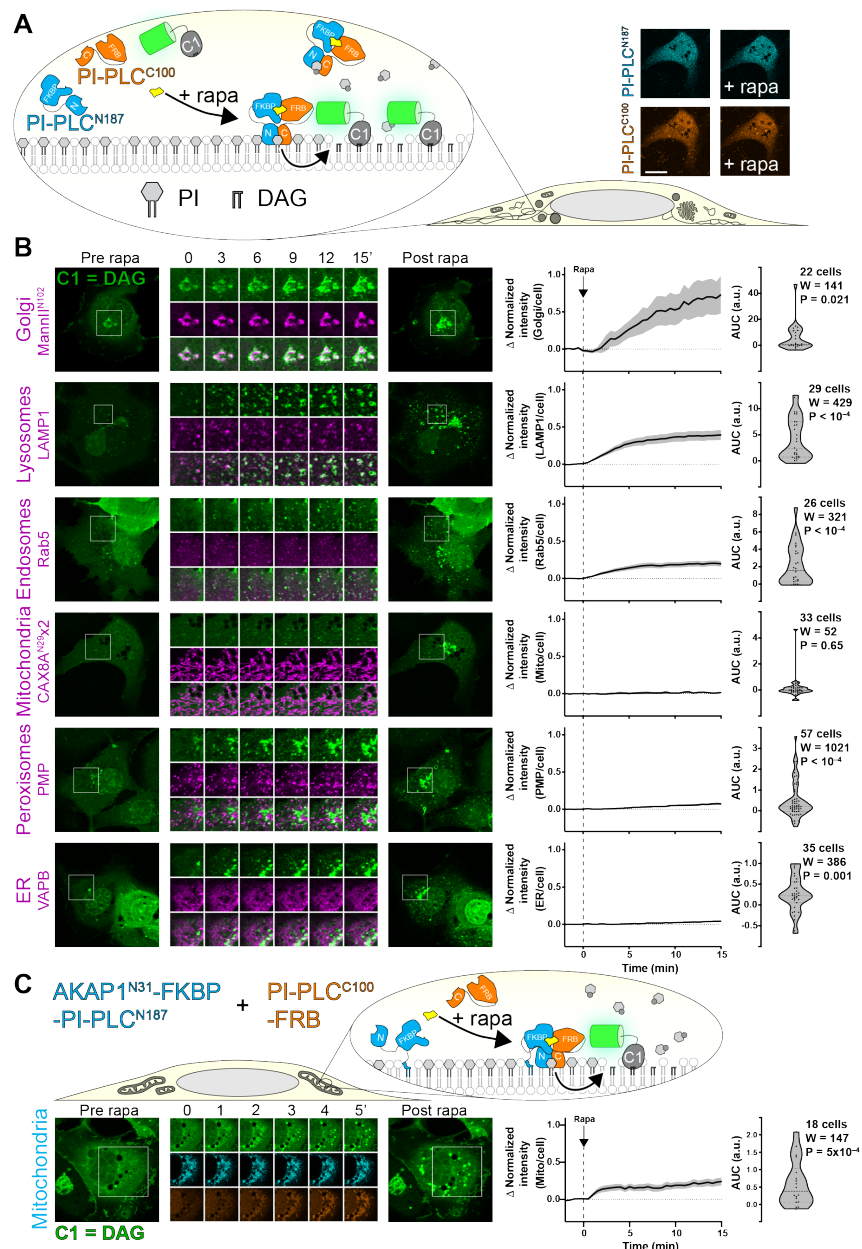

1

2 **Figure 2: Chemically-induced dimerization of a split PI-PLC induces intracellular accumulation of DAG.**  
 3 **Experimental set-up:** Rapamycin-induced dimerization of FKBP-fused N-terminal 187 residues of PI-PLC (cyan)  
 4 with the FRB-fused C-terminal 100 residues (orange) reconstitutes the active enzyme, though no visible change in  
 5 the cytosolic localization of the TagBFP2/iRFP-fused enzyme fragments is observed (confocal images at right). **(B)**  
 6 **DAG accumulation on cytosolic leaflets of intracellular organelles**, with the greatest increases in the Golgi and  
 7 endo/lysosomal compartments. Zero or comparatively minor changes were observed in mitochondria, peroxisomes or  
 8 the ER. Cells were expressing GFP-PKD1-C1ab to detect DAG, the indicated organelle markers fused to mCherry or  
 9 mKO (magenta), FKBP-PI-PLC<sup>N187</sup> and FRB-PI-PLC<sup>C100</sup> (not shown); they were treated with 1 μM rapamycin at time  
 10 0. Inset regions are 15 μm and serve as scale bars. **(C) Anchoring PI-PLC<sup>N187</sup> to the mitochondrial outer**  
 11 **membrane shows transient accumulation of DAG after recruitment of PI-PLC<sup>N100</sup>.** Cells were transfected as in  
 12 B, but with AKAP<sup>N31</sup>-fused PI-PLC<sup>N187</sup> replacing the unanchored version in B. Inset = 30 μm and serves as scale bar  
 13 in both B and C, the curves at right show the mean change in C1ab reporter intensity at each compartment, with  
 14 s.e.m. shaded. The violin plots show area under the curve, with the number of cells (pooled across 3-6 independent  
 15 experiments), the sum of signed ranks (W) and P-value from a two-tailed Wilcoxon signed rank test comparing to a  
 16 null hypothesis area under the curve value of 0.



1 Expression of TagBFP2-FKBP-PLC<sup>N187</sup> and PLC<sup>C100</sup>-FRB-iRFP showed both enzymes  
2 distributed in the cytoplasm, as observed with the full-length enzyme (Kim et al., 2011); no  
3 change in localization was observed when dimerization was induced with rapamycin (see  
4 micrographs in figure 2A). However, a GFP-C1ab DAG biosensor expressed in the same cells  
5 began to show an intense juxtannuclear accumulation and many small, punctate structures in the  
6 cytoplasm (figure 2B). We identified many of these structures through co-localization with co-  
7 expressed organelle markers (figure 2B). The juxtannuclear accumulation occurred in and around  
8 the Golgi membranes marked by ManII<sup>N102</sup>. Many of the cytoplasmic puncta showed co-  
9 localization with Rab5 or LAMP1 as markers of the early and endo/lysosomal compartments,  
10 respectively. Surprisingly, and in contrast to results with TopFluor-PI, we did not see substantial  
11 accumulation in the ER or mitochondria, nor peroxisomes. A small, statistically significant  
12 change in localization of C1ab fluorescence with peroxisomes and the ER was observed,  
13 though these may simply be due to chance overlap given the large increases in the number of  
14 cytoplasmic C1ab-labelled puncta. None seemed to precisely correspond to these organelles as  
15 they did for the Golgi and endosomes.

16 The most parsimonious explanation for our failure to observe PLC-mediated DAG generation at  
17 ER and mitochondria would be that little PI remains in the cytosolic leaflets of these organelle  
18 membranes. However, it is also possible that the cytosolic enzyme is not active on these  
19 membranes, or that the C1ab probe does not efficiently recognize DAG in these membrane  
20 contexts. Moreover, substantial recruitment of C1ab to DAG-replete membranes like the Golgi  
21 may also deplete the probe available to detect smaller pools elsewhere. To more directly probe  
22 for the presence of PI substrate, we targeted the amino-terminal lobe of PI-PLC to the outer  
23 mitochondrial membrane by fusing it to the amino-terminal 31 amino acids of AKAP1 (Ma and  
24 Taylor, 2002), with the aim of recruiting the carboxyl-terminal half to reconstitute the enzyme at  
25 the organelle surface (figure 2C). Indeed, we could see robust recruitment of PLC<sup>C100</sup>-FRB-iRFP  
26 with a time constant of approximately 3 minutes, which now yielded a substantial increase in  
27 C1ab labelling of the mitochondria with similar kinetics (figure S2B, D). Interestingly, although  
28 DAG appeared initially throughout the mitochondrial surface, the labelling rapidly resolved into  
29 small puncta. We do not know the nature of this re-localization of DAG, which could conceivably  
30 be phase separation or traffic of the accumulated lipid. It may, however, explain the failure to  
31 observe substantial labelling of the mitochondria by the cytosolic enzyme in our experiments  
32 (figure 2B) or previous studies (Kim et al., 2011).

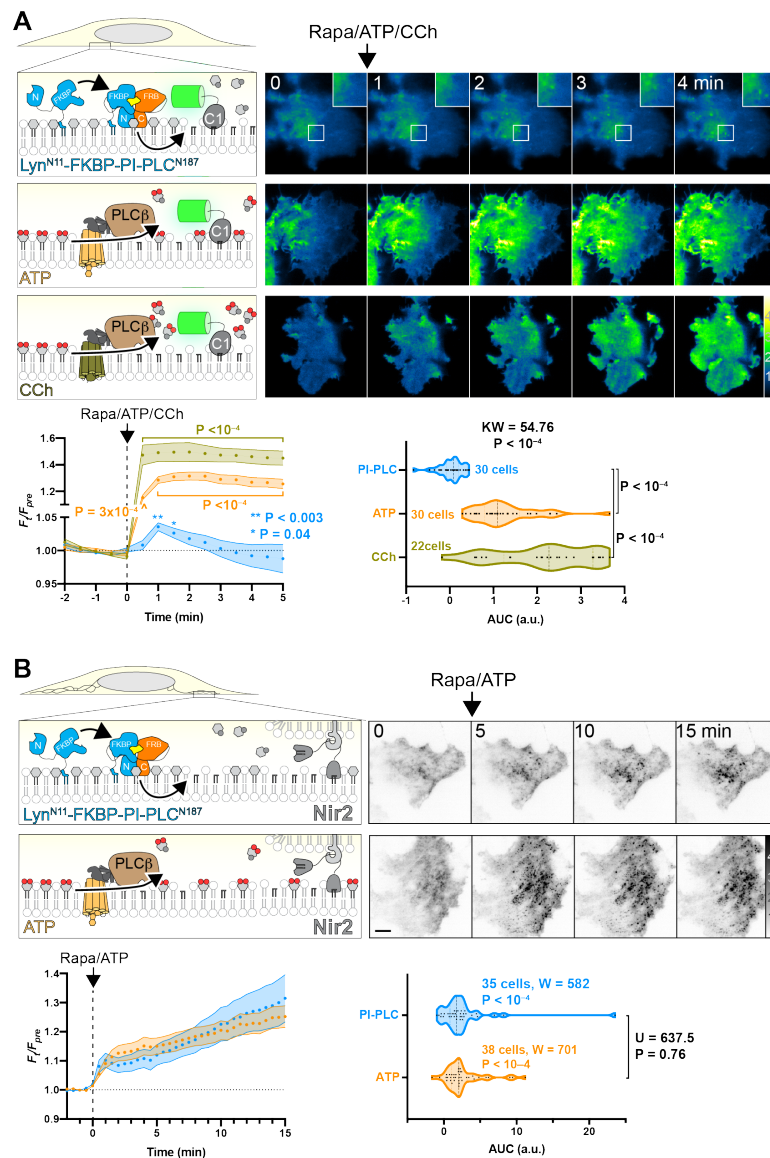

1

2 **Figure 3: Very little PI can be converted to DAG at the PM. (A) PM-specific dimerization of split PI-PLC**  
3 **induces very little DAG compared to PI(4,5)P<sub>2</sub>-specific PLC.** Cells were transfected with PI-PLC<sup>C100</sup>-FRB, PM-  
4 targeted Lyn<sup>N11</sup>-FKBP-PI-PLC<sup>N100</sup> and GFP-PKD1-C1ab to detect DAG. Rapamycin was used to induce PI-PLC  
5 reconstitution at the PM, or else endogenous PLCβ was activated by G<sub>q</sub>-coupled agonists ATP (to activate  
6 endogenous P2Y receptors) or carbachol (CCh), to activate over-expressed muscarinic M3 receptors). TIRFM images  
7 are color-coded to represent fluorescence intensity relative to pre-stimulus levels ( $F_t/F_{pre}$ ) as indicated. Inset region is  
8 5 μm and serves as scale bar for images in A. The line graphs show mean  $F_t/F_{pre}$  with s.e.m. shaded; P values are  
9 derived from Dunn's multiple comparison test comparing to time 0, following Friedman's test (Friedman statistic =  
10 49.16, PI-PLC,  $P = 0.045$ ; 497.0, ATP,  $P < 10^{-4}$ ; 282.3, CCh;  $P < 10^{-4}$ ). Where not indicated, the P value from Dunn's  
11  $> 0.05$ . The violin plots show area under the curve analysis of the line graphs with the number of cells from 3  
12 independent experiments, with results of a Kruskal-Wallis test and P values from a post-hoc Dunn's multiple  
13 comparison test indicated. **(B) Split PI-PLC induces translocation of Nir2 to ER-PM contact sites.** Cells were  
14 transfected with PM-targeted split PI-PLC and stimulated with rapamycin or ATP as in (A). Translocation of GFP-Nir2  
15 was recorded; images show representative TIRFM images with fluorescence normalized to pre-stimulus levels  
16 ( $F_t/F_{pre}$ ). Scale bar = 10 μm. The line graphs show mean  $F_t/F_{pre}$  with s.e.m. shaded; the violin plots show area  
17 under the curve analysis of the line graphs with the number of cells from 3 independent experiments indicated, along  
18 with results of Wilcoxon signed rank test comparing each population to a hypothesized AUC of 0, as well as a Mann-  
19 Whitney U test comparing the differences between AUC after ATP or rapamycin stimulation.

1 We attempted similar experiments with the ER. However, fusion of PI-PLC<sup>N187</sup> to the amino-  
2 terminal domain of STIM1 exhibited a mis-localized, punctate distribution in addition to the  
3 normal ER morphology, whereas fusion of PLC<sup>C100</sup> to the SAC1 carboxy-terminal TM domains  
4 failed to recruit cytosolic PI-PLC<sup>N187</sup> (J.P.Z., R.C.W. and G.R.V.H., unpublished observations).  
5 Therefore, we were unable to definitively probe the cytosolic face of the ER with this approach.

6  
7 We also produced a PM-targeted PI-PLC<sup>N187</sup> by fusion to the myristoylated and palmitoylated  
8 amino-terminal domain of Lyn kinase (figure 3A). Dimerization with rapamycin induced  
9 translocation of PI-PLC<sup>C100</sup> to the PM that was largely complete in 1 min (figure S2 B, C) and the  
10 formation of a few C1ab-labelled puncta in these cells, visible by total internal reflection  
11 microscopy (TIRFM). Nonetheless, the overall increase in DAG was small and transient. In  
12 contrast, activation of PI(4,5)P<sub>2</sub>-specific PLC $\beta$  by activation of either endogenous purinergic, or  
13 over-expressed muscarinic M3 receptors caused a much larger increase in DAG (figure 3A).  
14 This result would be consistent with the notion that in the PM, levels of PI are much lower  
15 compared to PI(4,5)P<sub>2</sub>; hydrolysis of a relatively small fraction of PI(4,5)P<sub>2</sub> induced by ATP still  
16 produces a much greater increase in DAG than PI-PLC-mediated hydrolysis of PM PI.

17 An alternative explanation to these data could be that the Lyn amino-terminal fusion does not  
18 orient the split-PI-PLC in an orientation conducive to activity in the PM; the few DAG puncta that  
19 we observe may instead be produced on organelle membranes that happen to approach close  
20 enough to the PM for the re-combined PI-PLC to hydrolyze their PI. Therefore, in order to test  
21 whether PM-targeted PI-PLC indeed generated DAG at the PM, we sought an alternative route  
22 to detect PM-localized DAG. To this end, we took advantage of the fact that translocation of the  
23 ER-localized PI/phosphatidic acid transfer protein Nir2 requires PM DAG to translocate to ER-  
24 PM contact sites (Kim et al., 2015). As shown in figure 3B, dimerization of split PI-PLC at the  
25 PM induced translocation of Nir2 to puncta as seen in TIRFM; this occurred to virtually the same  
26 extent as with activation of endogenous PLC $\beta$  with ATP. Although there were small differences  
27 in the kinetics of the translocation, no significant difference between the two stimuli was  
28 detected (figure 3B). Together with our observations with the C1ab DAG sensor, these data  
29 imply that sufficient PI is present at the PM that, when converted to DAG, can recruit Nir2; but it  
30 is far less than the quantity produced when hydrolysis of PI(4,5)P<sub>2</sub> is activated by endogenous  
31 PLC $\beta$ .



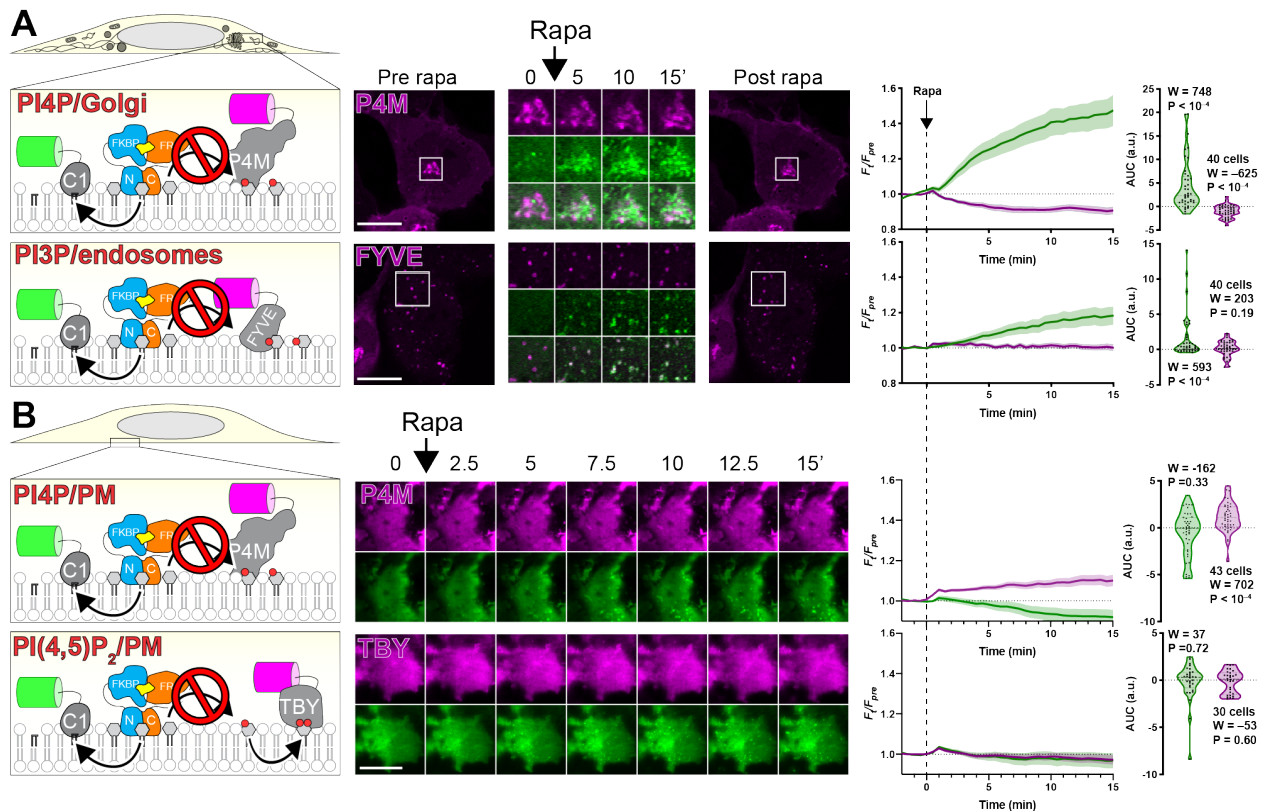

1

2 **Figure 4: PI-PLC leads to little or no depletion of PPI on Golgi and endosomes (A) or PM (B).** Cells were  
 3 transfected with PI-PLC<sup>C100</sup>-FRB, FKBP-PI-PLC<sup>N100</sup> (or PM-targeted Lyn<sup>N11</sup>-FKBP-PI-PLC<sup>N100</sup>) and GFP-PKD1-C1ab  
 4 to detect DAG, along with the indicated PPI biosensor. Dimerization and activation of PI-PLC was induced with 1  $\mu$ M  
 5 rapamycin as indicated. Images are confocal sections (A) or TIRFM (B). Scale bars = 20  $\mu$ m. Inset = 10  $\mu$ m for P4M  
 6 and 15  $\mu$ m for FYVE. Line graphs show the change in compartment specific fluorescence of C1ab (green) or the PPI  
 7 biosensor (magenta) to pre-rapamycin levels ( $F_{pre}$ ). The violin plots show area under the curve, with the  
 8 number of cells (pooled across 3 independent experiments), the sum of signed ranks (W) and P-value from a two-  
 9 tailed Wilcoxon signed rank test comparing to a null hypothesis area under the curve value of 0 (with a baseline of 1).

10 We also tested whether acute activation of PI-PLC reduced PI levels sufficiently to reduce levels  
 11 of phosphoinositides, as was previously reported for constitutive over-expression of the intact  
 12 enzyme (Kim et al., 2011). Notably, the large increase in C1ab after PI-PLC activation  
 13 correlated with a partial depletion of Golgi-associated PI4P biosensor, P4M (figure 4A).  
 14 However, within 15 min we could not detect decreases in endosomal association of PI3P  
 15 biosensor FYVE-EEA1 (figure 4A) nor PM PI(4,5)P<sub>2</sub> biosensor Tubby<sub>c</sub> (figure 4B). This could be  
 16 interpreted as a simple failure to sufficiently deplete the endosome or PM-associated PI levels.  
 17 Alternatively, it would be consistent with the PI pools utilized in synthesis of these lipids being  
 18 derived from other, non-PLC accessible sources that are not necessarily associated with these  
 19 organelles. Unexpectedly, we observed a small (~10%) but significant increase in PM PI4P  
 20 biosensor, P4M (figure 4B). It is possible that this results from a paradoxical increased supply of

1 PI to the PM, caused by the PI-PLC-induced translocation of Nir2 that we reported in figure 3B.  
2 This would require the endogenous PI4K to consume Nir2-delivered PI before the PM-targeted  
3 split PI-PLC, which would also be consistent with the failure of PI-PLC to deplete PI4P or  
4 PI(4,5)P<sub>2</sub> in these experiments.

5 Overall, these data demonstrate that PI is widely distributed in intracellular cytosolic  
6 membranes, though notably absent from the PM. These data are largely consistent with our  
7 observations of fluorescent PI re-distribution, though there were a number of differences,  
8 notably our failure to detect ER-associated PI. Therefore, we sought an alternative,  
9 corroborative approach.

#### 10 *Acute conversion to PI4P as a probe for PI*

11 We reasoned we could also detect the presence of PI via conversion to PI4P after recruitment  
12 of a PI 4-OH kinase (PI4K), in a similar approach to detecting DAG derived from acutely re-  
13 constituted PI-PLC. To this end, we selected PI4KIIIa (encoded by *PI4KA*, referred to as PI4KA  
14 hereafter). The enzyme exists as a large, 700 kDa multi-subunit complex (Lees et al., 2017;  
15 Dornan et al., 2018); however, the isolated carboxy-terminal fragment containing the helical and  
16 catalytic domain (PI4KA<sup>C1001</sup>) retains activity and can complement Hepatitis C proliferation in  
17 PI4KA knock-down cells (Harak et al., 2014). Therefore, we fused this fragment to FKBP to  
18 facilitate chemically induced dimerization with FRB, targeted to distinct organelle membranes  
19 (figure 5A). A catalytically inactive Asp<sup>1957</sup> to Ala mutant served as a negative control. PI4P was  
20 detected with highly selective and unbiased probes for PI4P, namely the relatively low affinity  
21 P4M domain (Hammond et al., 2014) and the higher affinity P4C domain (Weber et al., 2014;  
22 Luo et al., 2015) from *Legionella* effectors SidM and SidC, respectively.

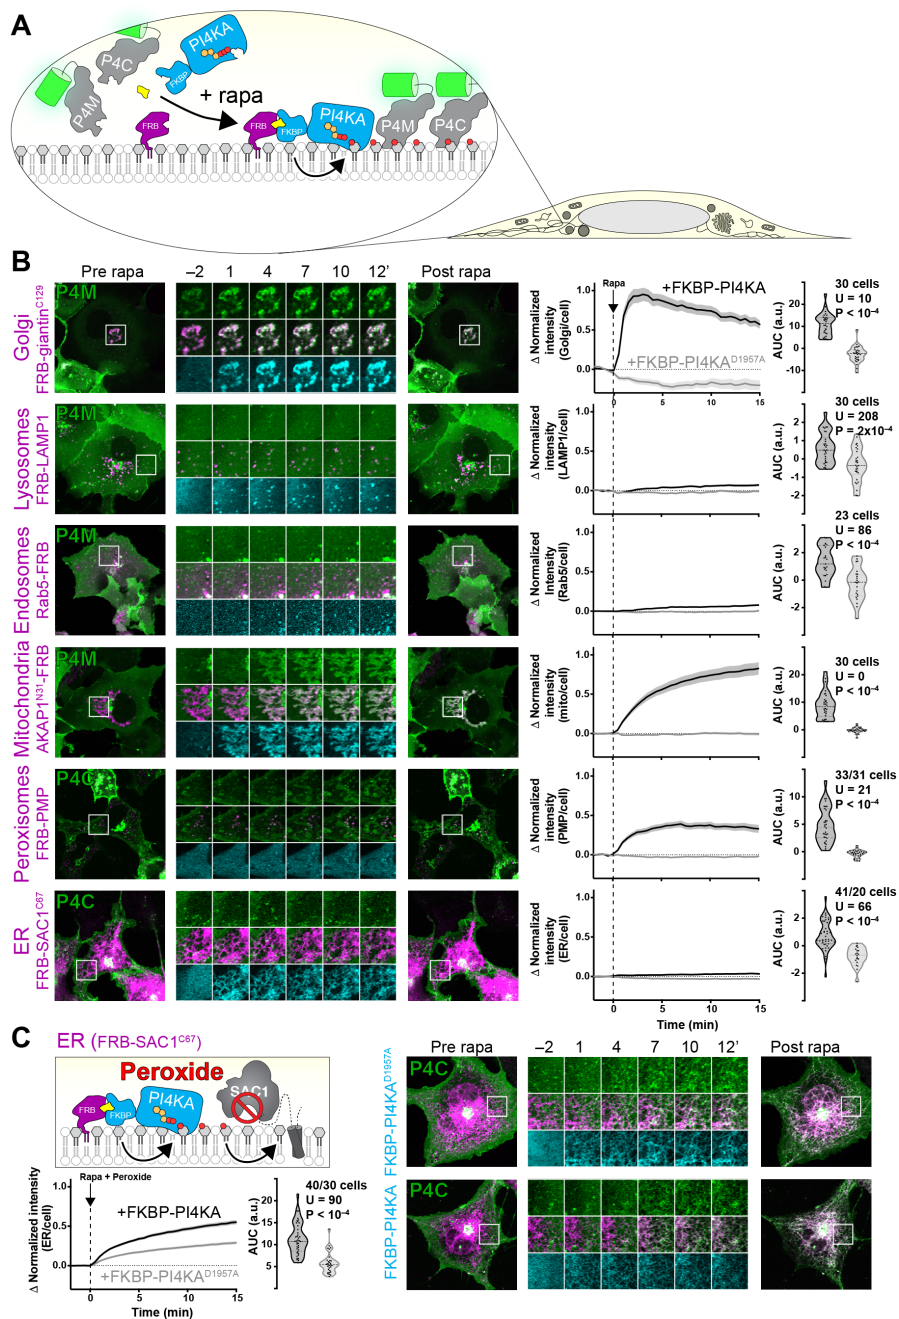

1

2 **Figure 5: Compartment-specific recruitment of PI4KA reveals intracellular PI pools. (A) Experimental set-up:**  
 3 Rapamycin-induced recruitment of FKBP-PI4KA<sup>N1001</sup> by dimerization with compartment-specific FRB to induce PI4P  
 4 synthesis from endogenous PI, revealed with GFP-P4M or -P4C. **(B) PI4P accumulation on cytosolic leaflets of**  
 5 **intracellular organelles**, with the greatest increases in the Golgi and mitochondria, with barely detectable increases  
 6 in endosomes and ER. Peroxisomes show a large increase, but PI4P intensity also occurs outside of PMP-marked  
 7 compartments. Cells are expressing GFP-P4M or -P4C (green), compartment-specific FRB (magenta) and FKBP-  
 8 PI4KA<sup>N1001</sup> (cyan) as indicated were treated with 1  $\mu$ M rapamycin at time 0. Inset regions are 15  $\mu$ m and serve as  
 9 scale bars. The line graphs at right show the mean change in PI4P reporter intensity at each compartment, with  
 10 s.e.m. shaded. The violin plots show area under the curve analysis of the curves, with the number of cells (pooled  
 11 across 2-4 independent experiments), Mann-Whitney U statistic and P-value from a two-tailed test. **(C) Peroxide-**  
 12 **mediated inhibition of ER-associated SAC1 PI4P phosphatase reveals an endogenous pool of PI that can be**

1 converted to PI4P. Experiment and data are identical to (B), except cells were treated with 500  $\mu$ M hydrogen peroxide  
2 in addition to rapamycin.

3 Kinetically, recruitment of FKBP-PI4KA<sup>C1001</sup> occurred with a time constant of 1-2 min to each  
4 organelle, with any PI4P biosensor recruitment occurring over a similar or slightly slower time  
5 constant (figure S3). In terms of magnitude, recruitment of PI4KA<sup>C1001</sup> to the Golgi induced a  
6 rapid and dramatic increase in PI4P levels at the Golgi (figure 5B), consistent with our  
7 observations with DAG after PI-PLC activation (figure 2B). Recruitment to Rab5- or LAMP1  
8 positive endosomes and lysosomes produced a small but significant increase in PI4P, though  
9 this was less marked than the increases in DAG after PI-PLC activation (figure 2B). On the  
10 other hand, we could observe a dramatic increase in PI4P on the mitochondrial outer membrane  
11 when recruiting PI4KA<sup>C1001</sup>, and a marked increase at peroxisomal membranes (figure 5B).  
12 Strangely, we noticed that in addition to producing PI4P in structures co-localizing with the  
13 peroxisomal FRB-PMP, an increase was also observed at a compartment with morphology  
14 consistent with mitochondria. We do not know if this is due to transfer of PI4P produced at  
15 peroxisomes to the mitochondrial outer membrane, perhaps via contact sites (Valm et al.,  
16 2017), or else direct synthesis of PI4P at mitochondrial membranes by a small pool of mis-  
17 targeted PMP.

18 We could barely detect PI4P synthesis at the ER after PI4KA<sup>C1001</sup> recruitment (figure 5B). We  
19 reasoned that this was likely due to the presence of SAC1, a highly active PI4P phosphatase  
20 present throughout the ER (Zewe et al., 2018). Inhibition of SAC1 with peroxide causes rapid  
21 accumulation of PI4P at the ER, which has been interpreted as being due PI4P transfer from  
22 other organelles (Zewe et al., 2018). We therefore reasoned that recruitment of PI4KA<sup>C1001</sup>  
23 during inhibition of SAC1 would cause a further increase in PI4P levels, due to conversion of  
24 any PI already present in the ER. Indeed, this is exactly what we observed: there was a  
25 substantial and highly significant increase in ER PI4P accumulation when active PI4KA<sup>C1001</sup> was  
26 recruited relative to the inactive control (figure 4C). Therefore, we could corroborate the  
27 presence of PI in the ER suggested by the accumulation of TopFluor-PI there (figure 1D).



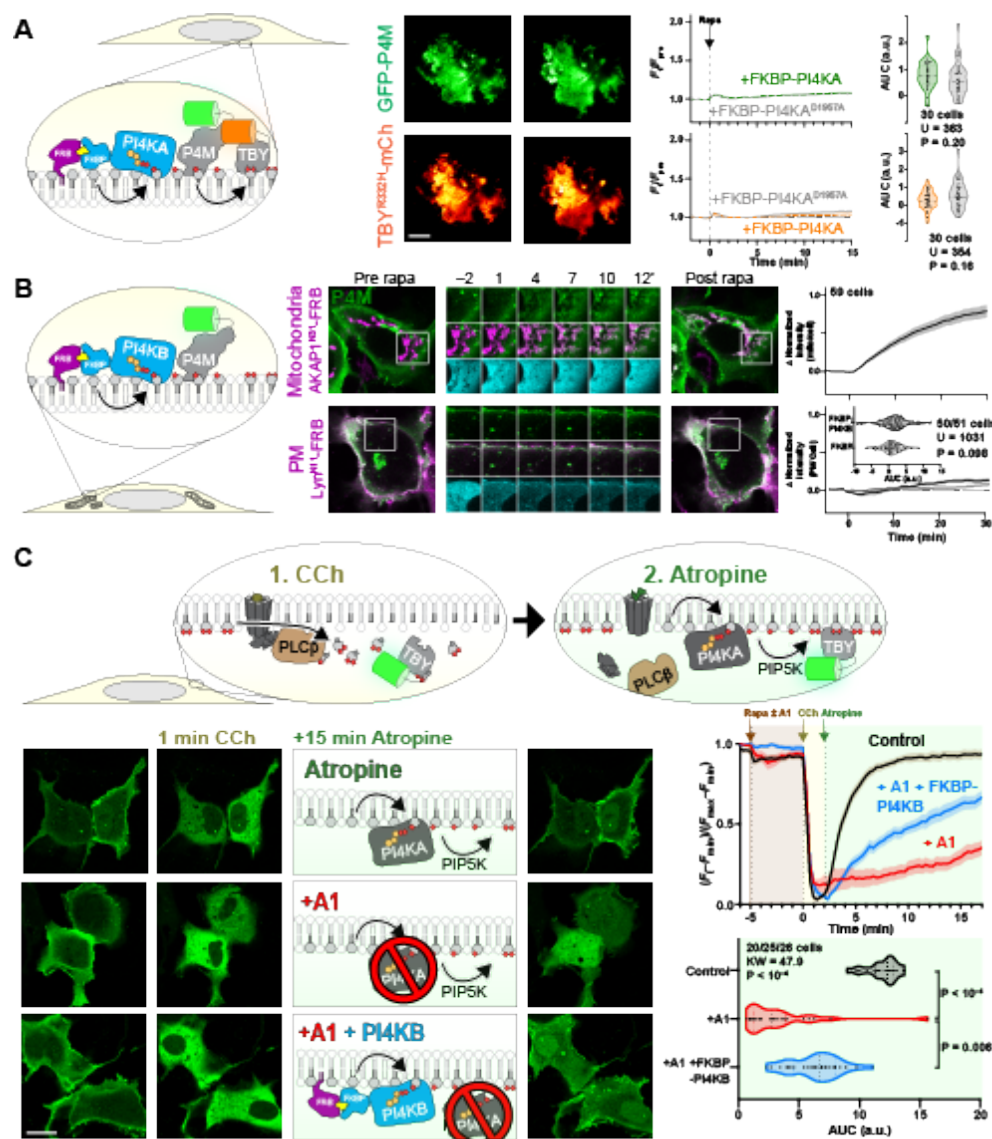

1

2 **Figure 6: Recruitment of PI4K to the PM reveals a scarcity of PI. (A) Recruitment of PI4K<sup>N1001</sup> shows no**  
 3 **increase in PI4P or PI(4,5)P<sub>2</sub>.** COS-7 cells imaged by TIRFM expressing GFP-P4Mx1 or Tubby<sub>c</sub>-mCherry together  
 4 with FKBP-PI4K<sup>N1001</sup> and Lyn<sup>N11</sup>-FRB were treated with 1  $\mu$ M rapamycin at time 0 to induce dimerization. Scale bar =  
 5 20  $\mu$ m. The curves at right show the mean change in reporter intensity, with s.e.m. shaded. The violin plots show  
 6 area under the curve analysis of the curves, with the number of cells (pooled across 3 independent experiments) and  
 7 the Mann-Whitney U statistic and P-value from a two-tailed test. **(B) PI4KB induces PI4P increases at the**  
 8 **mitochondria but not the PM.** COS-7 cells were transfected with P4Mx1 to detect PI4P increases by confocal  
 9 microscopy in conjunction with the indicated compartment-specific FRB and FKBP-PI4KB. Insets are 15  $\mu$ m and  
 10 serve as scale bars. Line graphs are means with s.e.m. shaded; inset violin plot shows area under the curve analysis,  
 11 with number of cells (pooled across 3 independent experiments) and the Mann-Whitney U statistic and P-value from  
 12 a two-tailed test. **(C) PI4KB is active in the PM.** COS-7 cells were co-transfected with PI(4,5)P<sub>2</sub> biosensor Tubby<sub>c</sub>-  
 13 GFP (green) and muscarinic M3 receptors, to stimulate PLC $\beta$ -induced PI(4,5)P<sub>2</sub> and PI4P depletion from the PM in  
 14 response to carbachol treatment. Subsequent treatment with the muscarinic antagonist atropine induces re-synthesis  
 15 of PI4P and PI(4,5)P<sub>2</sub> via endogenous PI4KA. Where indicated, the PI4KA inhibitor A1 was added at a 30 nM  
 16 concentration. Images show confocal sections (bar = 20  $\mu$ m) before stimulation, after addition of carbachol and  
 17 after atropine addition as indicated. Curves are means with s.e.m. shaded. The violin plot shows area under the curve  
 18 analysis for the post-atropine addition, with number of cells (three independent experiments), Kruskal-Wallis statistic  
 19 and P value from a two-tailed test. P values between individual groups show are derived from a post-hoc Dunn's  
 20 multiple comparison test.

1 In contrast, we could detect no increases in PI4P at the PM by TIRFM after recruiting PI4KA<sup>C1001</sup>  
2 (figure 6A), despite efficient recruitment within 1 min (figure S3B, C), consistent with our  
3 observations with PI-PLC (figure 3) and the distribution of TopFluor-PI (figure 1). We also saw  
4 no increase in PI(4,5)P<sub>2</sub> detected with the low affinity Tubby c-terminal domain mutant,  
5 Tubby<sub>c</sub><sup>R332H</sup> (Quinn et al., 2008), ruling out conversion of extra PI4P to this lipid (figure 6A). An  
6 obvious interpretation of this result is that there is little PI resident in the PM available for  
7 conversion to PI4P (or to PI(4,5)P<sub>2</sub>). However, we wanted to rule out other interpretations –  
8 specifically, that the PI4KA catalytic domain may be “biologically insufficient” to phosphorylate  
9 PI in the PM without assistance from PI transfer proteins (Grabon et al., 2015). To this end, we  
10 devised an experiment whereby the endogenous PM-associated PI4KA activity could be  
11 replaced with an alternative activity. For this purpose, we selected PI4KIIIβ (PI4KB), the isoform  
12 usually associated with PI4P synthesis at the Golgi (Balla and Balla, 2006). We made an FKBP  
13 fusion of this enzyme: recruitment to mitochondria occurred within 1 min and caused  
14 accumulation of PI4P in this membrane with a time course of approximately 11 min (figure 6B,  
15 S4), demonstrating the fusion was active. On the other hand, as we observed for FKBP-  
16 PI4KA<sup>C1001</sup>, no increases in PI4P were observed after recruitment of FKBP- to the PM PI4KB  
17 (which occurred within 1 min, figure S4) relative to an FKBP-only control (figure 6B).

18 We next sought to demonstrate that PI4KB can intrinsically be active at the PM, ruling out  
19 biological insufficiency of PI4KB or that the enzyme has a preference for acyl chains found in  
20 Golgi but not PM PI. One situation where a rapid increase in PM PI4P and PI(4,5)P<sub>2</sub> synthesis  
21 occurs is after recovery from PLCβ-mediated depletion of these lipids following muscarinic M3  
22 acetylcholine receptor activation (Willars et al., 1998). We overexpressed M3 receptors in COS-  
23 7 cells expressing the Tubby c-terminal domain as a PI(4,5)P<sub>2</sub> reporter (figure 6C). Cells were  
24 stimulated with carbachol for 2 min to activate PLCβ, then the muscarinic antagonist atropine  
25 was added to shut off the PLC and facilitate PI(4,5)P<sub>2</sub> re-synthesis via PI4P (Nakanishi et al.,  
26 1995). Control cells rapidly re-synthesized PM PI(4,5)P<sub>2</sub> within four minutes (figure 6C). We  
27 then repeated this experiment whilst blocking the endogenous PI4KA activity with the highly  
28 potent and selective inhibitor A1 (Bojjireddy et al., 2014); very little re-synthesis of PI(4,5)P<sub>2</sub>  
29 occurs under these conditions (figure 6C). Finally, we repeated the A1 treatment in cells in  
30 which the A1-resistant FKBP-PI4KB was recruited to the PM: This led to a substantial recovery  
31 of PM PI(4,5)P<sub>2</sub> synthesis, though this was slower than in controls and incomplete in the 15 min  
32 period of the experimental recovery (figure 6C). Nonetheless, clear activity of PI4KB could be

1 demonstrated in the PM – arguing strongly that a failure to further increase PI4P (or PI(4,5)P<sub>2</sub>)  
2 levels in unstimulated cells is due to a scarcity of PI available for conversion.

### 3 **Discussion**

4 In this paper, we performed experiments to map the subcellular distribution of PI in intact, living  
5 cells. We were particularly interested with respect to organelles that contain PPI<sub>n</sub>, since the  
6 availability of PI substrate for PPI<sub>n</sub> synthesis has important implications for the regulation of  
7 PPI<sub>n</sub> abundance and downstream physiology. We took three complimentary approaches: the  
8 localization of an exogenous, fluorescent PI (figure 1); localization of DAG, converted from PI by  
9 an acutely-activated PI-PLC (figures 2-4); and localization of PI4P, after acute conversion of PI  
10 by a membrane-recruited PI4K (figures 5-6). Broadly speaking, these approaches demonstrated  
11 the presence of PI in multiple intracellular membranes, but a relatively small amount (compared  
12 to PPI<sub>n</sub>) at the PM (see the summary of results in table 1).

13 Each of the three approaches has significant caveats. Optical imaging of fluorescent lipids fails  
14 to give information as to the bilayer distribution, so does not necessarily reflect the PI available  
15 for conversion to PPI<sub>n</sub> by cytosolic PI kinases. Furthermore, the fluorescent moiety may disrupt  
16 the traffic and distribution of the exogenous lipid; for example, whereas TopFluor-labelled PS  
17 reflects closely the distribution of endogenous PS (Kay et al., 2012), NBD-labelled PS fails to  
18 show enrichment at the cytosolic face of the PM (Martin and Pagano, 1987).

19 On the other hand, acute conversion of PI to DAG or PI4P by acute chemogenetic activation of  
20 enzymes strictly reports endogenous, cytosolic leaflet-resident PI. Nevertheless, there are also  
21 substantial confounds to these experiments. Breakdown of a large fraction of phospholipid in a  
22 membrane to the much less polar DAG may dramatically alter bilayer properties (Alwarawrah et  
23 al., 2016). Moreover, DAG can readily flop to the exoplasmic leaflet (Bai and Pagano, 1997), or  
24 else be metabolized by DAG kinase, acyltransferases or lipases. Each process could  
25 significantly limit translocation of the C1ab domain probe, perhaps explaining the transient DAG  
26 accumulation observed at mitochondria before the signal resolves into a more punctate  
27 distribution (figure 2C). Likewise, acutely-induced PI4P could be subject to phosphorylation or  
28 dephosphorylation by PPI<sub>n</sub> enzymes, or else sequestration or transport by, for example, the  
29 OSBP-related family of proteins (Olkkonen, 2015). Indeed, the presence of the PI4P  
30 phosphatase Sac2 and the PI4P transfer protein OSBP at endosomes (Hsu et al., 2015);

1 Nakatsu et al., 2015; Dong et al., 2016) may explain our failure to induce significant PI4P  
2 accumulation at endosomes (figure 5B and table 1). Certainly, conditions wherein the ER-  
3 localized Sac1 phosphatase is limited allowed us to detect increased PI4P accumulation at the  
4 ER compared to conditions where native Sac1 was still active (figure 5C).

5 Our most consistent finding from all three approaches was that they all failed to identify  
6 substantial PM-associated pools of PI (table 1). Although surprising, this observation is  
7 consistent with biochemical quantification from rapidly isolated PM sheets (Saheki et al., 2016).  
8 This finding is significant, in that it moves the onus for regulating PM PPI<sub>n</sub> synthesis from the  
9 PI4K-catalyzed PI phosphorylation to the supply of PI substrate for this enzyme.

10 The need for re-supply of ER-synthesized PI to the PM for PPI<sub>n</sub> synthesis has been known for a  
11 good many years (Lapetina and Michell, 1973). Vesicular transport of PI4P or PI from the Golgi,  
12 an organelle that we show is replete with both lipids, can contribute to PM PI(4,5)P<sub>2</sub> synthesis  
13 (Szentpetery et al., 2010; Dickson et al., 2014). However, these contributions do not explain the  
14 full capacity for PM synthesis, and the speed of the secretory pathway from the ER does not  
15 match the rate at which PM pools of PPI<sub>n</sub> can be turned over; instead, the activity of PI transfer  
16 proteins has been proposed to feed PPI<sub>n</sub> synthesis directly from the ER (Lapetina and Michell,  
17 1973). More recently, specific PI transfer proteins such as Nir2 and TMEM24 have been  
18 identified in PM PPI<sub>n</sub> re-synthesis after activation of phospholipase C (Lees et al., 2017b;  
19 Dornan et al., 2018). Intriguingly, several of these studies found that simple over-expression of  
20 these transfer proteins can accelerate synthesis or elevate steady-state levels of PM PPI<sub>n</sub>  
21 (Chang et al., 2013; Kim et al., 2015; Lees et al., 2017a). Such observations are easily  
22 explained when viewed through the prism of our findings, which demonstrate a limited supply of  
23 PI at the PM; expanding the supply process is thus expected to increase synthesis or steady-  
24 state levels. However, they do not explain how cells control steady-state PI4P and PI(4,5)P<sub>2</sub>  
25 accumulation. Recently, a regulatory mechanism that puts a break on PI4P catabolism at the  
26 PM when levels of PI(4,5)P<sub>2</sub> drop has been demonstrated (Sohn et al., 2018). However, what  
27 homeostatic mechanism(s) maintain steady state levels of PI(4,5)P<sub>2</sub>, and how this mechanism  
28 couples to the transport of PI to the PM, is a significant question for the future.

29



## 1 **Acknowledgments**

2 We thank colleagues cited in the Materials and methods for generously sharing plasmids. This  
3 work was supported by National Institutes of Health grant 1R35GM119412-01 (to G.R.V.H.).

## 4 **Author Contributions**

5 J. P. Zewe, R. C. Wills, B.D. Goulden, G.R.V. Hammond conceived of the experiments and  
6 developed methods. J.P. Zewe, A. Miller, S. Sangappa, R. C. Wills and G.R.V. Hammond  
7 performed experiments. J.P. Zewe, A. Miller, S. Sangappa, R. C. Wills and G.R.V. Hammond  
8 analyzed data. G.R.V. Hammond acquired grant funding for this study. G.R.V. Hammond wrote  
9 the original draft of the manuscript; All authors reviewed and edited the manuscript.

## 10 **Conflict of Interest**

11 The authors declare no competing financial interests.

## 12 **Materials and Methods**

### 13 *Plasmids and Cloning*

14 Production of new plasmids for this study was accomplished by standard restriction-ligation or  
15 NEBuilder HiFi DNA Assembly (New England Biolabs E5520S), typically using Clontech  
16 pEGFP-C1 and -N1 backbones or their derivatives. Our standard fluorophores were a human  
17 codon optimized EGFP derived from *Aequorea victoria* GFP containing F64L and S65T  
18 mutations (Cormack et al., 1996), a *Discoma* DsRed monomeric variant known as mCherry  
19 (Shaner et al., 2004), the iRFP variant derived from *Rhodospseudomonas palustris*  
20 bacteriophytochrome BphP2 (Filonov et al., 2011), and mTagBFP2 derived from *Entacmaea*  
21 *quadricolor* protein eqFP578 (Subach et al., 2011). Mutated constructs were generated by site-  
22 directed mutagenesis using targeted pairs of DNA oligos. All custom oligos were supplied by  
23 ThermoFisher. After cloning, all constructs were sequence verified by Sanger DNA sequencing.  
24 Plasmids constructed for this study are available through Addgene ([www.addgene.org](http://www.addgene.org)). Table 2  
25 lists all plasmids used in this study and their respective sources.

### 26 *Chemicals and Reagents*

1 For chemical dimerization experiments, Rapamycin (Fisher Scientific BP2963-1) was dissolved  
2 to 1 mM in DMSO as a stock and used at a final concentration of 1  $\mu$ M in cells. Carbachol  
3 (Fisher Scientific AC10824-0050) was prepared by dissolving in water to 50 mM and stored at -  
4 20°C. Atropine (Fisher Scientific AC226680100) was dissolved to 25 mM in 100% ethanol and  
5 stored at -20°C. 30% H<sub>2</sub>O<sub>2</sub> (EMD Millipore HX0635-3) was stored at 4°C and prepared fresh in  
6 complete imaging media when used as an additive. A1 PI4KA inhibitor (Bojjireddy et al., 2014),  
7 a kind gift from Tamas Balla, was dissolved in DMSO to a 100  $\mu$ M stock and stored at -20°C.

### 8 *Cell Culture and Lipofection*

9 COS-7 (ATCC CRL-1651) cells were cultured at 37°C with a humidified 5% CO<sub>2</sub> atmosphere in  
10 low glucose DMEM (ThermoFisher 10567022) supplemented with 10% heat-inactivated fetal  
11 bovine serum (ThermoFisher 10438-034), 100 units/mL Penicillin-Streptomycin (ThermoFisher  
12 15140122) and 0.1% chemically defined lipid supplement (ThermoFisher 11905031). Cells  
13 were passaged two times a week 1:5 in culture-treated flasks using TrypLE dissociation media  
14 (ThermoFisher 12604039).

15 In preparation for imaging, cells were seeded onto 35 mm #1.5 cover glass bottom dishes  
16 (CellVis D35-20-1.5-N) pre-coated with 5  $\mu$ g of human fibronectin (ThermoFisher 33016-015)  
17 dissolved in water. Once adherent and between 50% - 80% confluent, cells were transfected  
18 according to manufacturer's instructions using 1  $\mu$ g of total DNA complexed with 3  $\mu$ g  
19 Lipofectamine2000 (ThermoFisher 11668019) in 200  $\mu$ L Opti-MEM (ThermoFisher 51985091).  
20 Imaging of transfected samples occurred after an incubation time of ~18-24 hr.

### 21 *Fluorescent Lipids*

22 TopFluor® conjugated PI, PS, and PI(4,5)P<sub>2</sub> were obtained from Avanti Polar Lipids Inc.  
23 (810187P, 810283P, 810184P). Lipid-BSA complexing was accomplished using 5  $\mu$ M (0.34  
24 mg/ml) fatty acid-free BSA (Sigma 126575) dissolved in PBS with 3 mM EGTA. Fluorescent  
25 lipids were sonicated in methanol at a concentration of 1 mM before injecting 5  $\mu$ l into 1 ml  
26 BSA/PBS mixture and vortexed at medium to high speed and incubated at 37°C for 20-30 min.  
27 Back-extraction media was made using 17 mg/mL fatty acid-free BSA (i.e. 250  $\mu$ M, 5 x the final  
28 concentration applied to cells) in serum-free imaging media and filtered.

### 29 *Thin-layer Chromatography*

1 LK6D 60 Å silica gel 20 x 20 cm glass-backed TLC plates (Whatman 4865-821) were prepared  
2 by dipping into 74 mM sodium oxalate in 0.5% boric acid and dried overnight. Before loading,  
3 plates were pre-equilibrated in a 70:70:4:16 chloroform, methanol, ammonium hydroxide and  
4 water mixture. After loading, the plates were run in the same solvent mixture, then removed and  
5 allowed to dry for 15 min at room temperature in a fume hood. Fluorescent lipids were imaged  
6 using a ChemiDoc MP imaging system (BioRad) using 460-490 nm LED epi-illumination and a  
7 518-546 nm emission filter.

8 Cells were extracted using a modified protocol (Lees et al., 1959). Briefly, cells in 35 mm glass  
9 bottom dishes were lysed in 250 µl 1 M HCl, scraped and collected in polypropylene tubes. The  
10 dishes were rinsed with 333 µl methanol, which was then pooled with the HCl extract. 667 µl  
11 chloroform was then added to the extracts before samples were vortexed vigorously and  
12 centrifuged to resolve two phases. The lower phase was removed and washed with 3:48:47  
13 chloroform:methanol:1M HCl, and the upper phase re-extracted with 86:14:1  
14 chloroform:methanol:1M HCl. After re-centrifuging to resolve phases, the washed lower phase  
15 was transferred to a fresh polypropylene tube, and the re-extracted upper phase was washed.  
16 This washed re-extract was pooled with the original extract and dried under nitrogen. Samples  
17 were re-dissolved in 30 µL of a 86:14:1 mixture of chloroform, methanol and 1M HCl and  
18 streaked into the concentration zone of the TLC plate to run.

## 19 *Microscopy*

20 For all live-cell imaging, standard growth medium was replaced with Fluorobrite DMEM  
21 (ThermoFisher A1896702) supplemented with 10% heat-inactivated fetal bovine serum, 25mM  
22 HEPES (pH 7.4), 0.1% chemically defined lipid supplement and 2 mM Glutamax (ThermoFisher  
23 35050061). Initial volume of imaging media was adjusted so that 2 mL total volume was  
24 achieved after all chemical additions for a given experiment.

25 Confocal imaging was accomplished on a Nikon TiE A1R platform acquiring images in resonant  
26 mode with a 100X 1.45 NA plan-apochromatic objective. Signal to noise ratio was improved by  
27 taking 8 frame averages. Excitation of fluorophores was accomplished via a dual fiber-coupled  
28 LUN-V laser launch with 405 nm (BFP), 488 nm (GFP), 561 nm (mCherry) and 640nm (iRFP)  
29 lines. Emission was collected through dual pass filters from Chroma: blue/yellow-orange (420-  
30 480 nm / 570-620 nm) and green/far-red (505-550 nm / 650-850 nm). Confocal pinhole size was

1 defined as 1.2X the Airy disc size of the longest wavelength channel used in the experiment.  
2 Nikon Elements software was used to acquire images for all experiments. All data were saved  
3 with the file extension .nd2.

4 An independent Nikon TiE platform coupled with a TIRF illuminator arm (Nikon) and 100X 1.45  
5 NA plan-apochromatic objective was used to acquire TIRFM imaging data. Excitation of  
6 fluorophores was accomplished via an Oxixius L4C laser launch with 405nm (BFP), 488 nm  
7 (EGFP), 561nm (mCherry) and 638nm (iRFP) lines. Emission was collected through dual pass  
8 filters from Chroma: blue/yellow-orange (420-480 nm / 570-620 nm) and green/far-red (505-550  
9 nm / 650-850 nm). A Zyla 5.5 sCMOS camera (Andor) was used to capture images, binning  
10 2X2. Nikon Elements software was used to acquire images for all experiments. All data were  
11 saved with the file extension .nd2.

## 12 *Image Analysis*

13 Analysis of images was accomplished in Fiji software (Schindelin et al., 2012). A custom macro  
14 was written to generate channel-specific montages and display all xy positions captured in a  
15 given experiment in concatenated series. Individual regions of interest (ROI) were then  
16 generated around cells displayed in these montages.

17 The ratio of fluorescence intensity between specific compartments in confocal images were  
18 analyzed as described previously (Zewe et al., 2018). A custom macro was used to generate a  
19 binary mask through à trous wavelet decomposition (Olivo-Marin, 2002). The mask was applied  
20 to measure fluorescence intensity within a given compartment, while normalizing to the ROI's  
21 mean pixel intensity to account for variance in expression level present in transient  
22 transfections.

23 To analyze TIRFM images, a minimum intensity projection was used as the basis to generate  
24 ROIs within the footprint of individual cells. Background fluorescence values were measured  
25 and subtracted from images at all time-points. Fluorescence values were then normalized to  
26 the ROI's mean pixel intensity of time-points preceding treatment or stimulation.

27 For statistical analysis and generation of graphs and plots, quantitative data was imported into  
28 Prism 8 (GraphPad). For area under the curve (AUC) analysis, baseline-corrected data were  
29 first sorted into groups of individual curves. The net area under the curve for each ROI was

1 then pooled and compared among conditions. D'Agostino and Pearson normality tests returned  
2 values that significantly varied from a normal distribution, so data were subjected to a non-  
3 parametric Kruskal-Wallis test and if significant variance between medians was found, Dunn's  
4 multiple comparisons test was run post-hoc.

5 All representative images were selected based on a robust signal to noise ratio, typical  
6 morphology and fluorescence measurements near the median of its cohort. Any adjustments  
7 made to brightness or contrast to ease visibility were made in a linear fashion across the entire  
8 image.

### 9 *Supplementary material*

10 Figure S1 shows controls for cross-talk for the data presented in figure 1C-E. Figure S2 shows  
11 the kinetics of recruitment of split-PI-PLC to organelle-specific compartments. Figures S3 and  
12 S4 show kinetics of recruitment of FKBP-PI4KA and -PI4KB, respectively.

## 1 References

- 2  
3 Alwarawrah M, Hussain F, Huang J. 2016. Alteration of lipid membrane structure and dynamics  
4 by diacylglycerols with unsaturated chains. *Biochimica Biophys Acta* **1858**:253–263.  
5 doi:10.1016/j.bbamem.2015.11.014  
6  
7 Anderson KE, Kielkowska A, Durrant TN, Juvin V, Clark J, Stephens L, Hawkins PT. 2013.  
8 Lysophosphatidylinositol-Acyltransferase-1 (LPIAT1) Is Required to Maintain Physiological  
9 Levels of PtdIns and PtdInsP2 in the Mouse. *PLoS ONE* **8**:e58425.  
10 doi:10.1371/journal.pone.0058425  
11  
12 Bai J, Pagano RE. 1997. Measurement of Spontaneous Transfer and Transbilayer Movement of  
13 BODIPY-Labeled Lipids in Lipid Vesicles†. *Biochemistry* **36**:8840–8848. doi:10.1021/bi970145r  
14  
15 Balla A, Balla T. 2006. Phosphatidylinositol 4-kinases: old enzymes with emerging functions.  
16 *Trends Cell Biology* **16**:351–361. doi:10.1016/j.tcb.2006.05.003  
17  
18 Balla T. 2013. Phosphoinositides: Tiny Lipids With Giant Impact on Cell Regulation. *Physiol Rev*  
19 **93**:1019–1137. doi:10.1152/physrev.00028.2012  
20  
21 Balla T, Bondeva T, Várnai P. 2000. How accurately can we image inositol lipids in living cells?  
22 *Trends Pharmacol Sci* **21**:238–241. doi:10.1016/s0165-6147(00)01500-5  
23  
24 Bochud A, Conzelmann A. 2015. The active site of yeast phosphatidylinositol synthase Pis1 is  
25 facing the cytosol. *Biochim Biophys Acta* **1851**. doi:10.1016/j.bbalip.2015.02.006  
26  
27 Bojjireddy N, Botyanszki J, Hammond G, Creech D, Peterson R, Kemp DC, Snead M, Brown R,  
28 Morrison A, Wilson S, Harrison S, Moore C, Balla T. 2014. Pharmacological and Genetic  
29 Targeting of the PI4KA Enzyme Reveals Its Important Role in Maintaining Plasma Membrane  
30 Phosphatidylinositol 4-Phosphate and Phosphatidylinositol 4,5-Bisphosphate Levels. *J Biol*  
31 *Chem* **289**:6120–6132. doi:10.1074/jbc.m113.531426  
32  
33 Bütikofer P, Lin Z, Chiu D, Lubin B, Kuypers F. 1990. Transbilayer distribution and mobility of  
34 phosphatidylinositol in human red blood cells. *J Biol Chem* **265**:16035–8.  
35  
36 Chang C-L, Hsieh T-S, Yang TT, Rothberg KG, Azizoglu BD, Volk E, Liao J-C, Liou J. 2013.  
37 Feedback Regulation of Receptor-Induced Ca<sup>2+</sup> Signaling Mediated by E-Syt1 and Nir2 at  
38 Endoplasmic Reticulum-Plasma Membrane Junctions. *Cell Rep* **5**:813–825.  
39 doi:10.1016/j.celrep.2013.09.038  
40  
41 Cormack BP, Valdivia RH, Falkow S. 1996. FACS-optimized mutants of the green fluorescent  
42 protein (GFP). *Gene* **173**:33–38. doi:10.1016/0378-1119(95)00685-0  
43  
44 Courtney T, Deiters A. 2018. Recent advances in the optical control of protein function through  
45 genetic code expansion. *Curr Opin Chem Biol* **46**:99–107. doi:10.1016/j.cbpa.2018.07.011  
46  
47 DeRose R, Miyamoto T, Inoue T. 2013. Manipulating signaling at will: chemically-inducible  
48 dimerization (CID) techniques resolve problems in cell biology. *Pflügers Arch* **465**:409–417.  
49 doi:10.1007/s00424-012-1208-6  
50

- 1 Dickson EJ, Hille B. 2019. Understanding phosphoinositides: rare, dynamic, and essential  
2 membrane phospholipids. *Biochem J* **476**:1–23. doi:10.1042/BCJ20180022  
3
- 4 Dickson EJ, Jensen JB, Hille B. 2014. Golgi and plasma membrane pools of PI(4)P contribute to  
5 plasma membrane PI(4,5)P<sub>2</sub> and maintenance of KCNQ2/3 ion channel current. *Proc Natl Acad*  
6 *Sci* **111**:E2281–E2290. doi:10.1073/pnas.1407133111  
7
- 8 Dong R, Saheki Y, Swarup S, Lucast L, Harper WJ, De Camilli P. 2016. Endosome-ER  
9 Contacts Control Actin Nucleation and Retromer Function through VAP-Dependent Regulation  
10 of PI4P. *Cell* **166**:408–423. doi:10.1016/j.cell.2016.06.037  
11
- 12 Dornan GL, Dalwadi U, Hamelin DJ, Hoffmann RM, Yip CK, Burke JE. 2018. Probing the  
13 Architecture, Dynamics, and Inhibition of the PI4KIIIα/TTC7/FAM126 Complex. *J Mol Biol*  
14 **430**:3129–3142. doi:10.1016/j.jmb.2018.07.020  
15
- 16 Ferrell J, Huestis W. 1984. Phosphoinositide metabolism and the morphology of human  
17 erythrocytes. *J Cell Biol* **98**:1992–1998. doi:10.1083/jcb.98.6.1992  
18
- 19 Filonov GS, Piatkevich KD, Ting L-M, Zhang J, Kim K, Verkhusha VV. 2011. Bright and stable  
20 near-infrared fluorescent protein for in vivo imaging. *Nat Biotechnol* **29**:757–761.  
21 doi:10.1038/nbt.1918  
22
- 23 Gässler CS, Ryan M, Liu T, Griffith HO, Heinz DW. 1997. Probing the Roles of Active Site  
24 Residues in Phosphatidylinositol-Specific Phospholipase C from *Bacillus cereus* by Site-Directed  
25 Mutagenesis†. *Biochemistry* **36**:12802–12813. doi:10.1021/bi971102d  
26
- 27 Goulden BD, Pacheco J, Dull A, Zewe JP, Deiters A, Hammond G. 2018. A high-avidity  
28 biosensor reveals plasma membrane PI(3,4)P<sub>2</sub> is predominantly a class I PI3K signaling  
29 product. *J Cell Biol*. doi:10.1083/jcb.201809026  
30
- 31 Grabon A, Khan D, Bankaitis VA. 2015. Phosphatidylinositol transfer proteins and instructive  
32 regulation of lipid kinase biology. *Biochim Biophys Acta* **1851**:724–735.  
33 doi:10.1016/j.bbailip.2014.12.011  
34
- 35 Griffiths G, Back R, Marsh M. 1989. A quantitative analysis of the endocytic pathway in baby  
36 hamster kidney cells. *J Cell Biol* **109**:2703–2720. doi:10.1083/jcb.109.6.2703  
37
- 38 Hammond G, Balla T. 2015. Polyphosphoinositide binding domains: Key to inositol lipid biology.  
39 *Biochim Biophys Acta* **1851**:746–758. doi:10.1016/j.bbailip.2015.02.013  
40
- 41 Hammond G, Machner MP, Balla T. 2014. A novel probe for phosphatidylinositol 4-phosphate  
42 reveals multiple pools beyond the Golgi. *J Cell Biol* **205**:113–126. doi:10.1083/jcb.201312072  
43
- 44 Harak C, Radujkovic D, Taveneau C, Reiss S, Klein R, Bressanelli S, Lohmann V. 2014.  
45 Mapping of Functional Domains of the Lipid Kinase Phosphatidylinositol 4-Kinase Type III Alpha  
46 Involved in Enzymatic Activity and Hepatitis C Virus Replication. *J Virol* **88**:9909–9926.  
47 doi:10.1128/jvi.01063-14  
48
- 49 Hsu F, Hu F, Mao Y. 2015. Spatiotemporal control of phosphatidylinositol 4-phosphate by Sac2  
50 regulates endocytic recycling. *J Cell Biol* **209**:97–110. doi:10.1083/jcb.201408027  
51



- 1 Jović M, Kean MJ, Szentpetery Z, Polevoy G, Gingras A-C, Brill JA, Balla T. 2012. Two  
2 phosphatidylinositol 4-kinases control lysosomal delivery of the Gaucher disease enzyme,  $\beta$ -  
3 glucocerebrosidase. *Mol Biol Cell* **23**:1533–1545. doi:10.1091/mbc.e11-06-0553  
4
- 5 Kay JG, Koivusalo M, Ma X, Wohland T, Grinstein S. 2012. Phosphatidylserine dynamics in  
6 cellular membranes. *Mol Biol Cell* **23**:2198–2212. doi:10.1091/mbc.E11-11-0936  
7
- 8 Kim Y, Guzman-Hernandez M, Balla T. 2011. A Highly Dynamic ER-Derived  
9 Phosphatidylinositol-Synthesizing Organelle Supplies Phosphoinositides to Cellular  
10 Membranes. *Dev Cell* **21**:813–824. doi:10.1016/j.devcel.2011.09.005  
11
- 12 Kim Y, Guzman-Hernandez M-L, Wisniewski E, Balla T. 2015. Phosphatidylinositol-  
13 Phosphatidic Acid Exchange by Nir2 at ER-PM Contact Sites Maintains Phosphoinositide  
14 Signaling Competence. *Dev Cell* **33**:549–561. doi:10.1016/j.devcel.2015.04.028  
15
- 16 Lange Y, Aisgood, Ramos B, Steck T. 1989. Plasma membranes contain half the phospholipid  
17 and 90% of the cholesterol and sphingomyelin in cultured human fibroblasts. *J Biol Chem*  
18 **264**:3786–93.  
19
- 20 Lapetina EG, Michell RH. 1973. Phosphatidylinositol metabolism in cells receiving extracellular  
21 stimulation. *FEBS Lett* **31**:1–10. doi:10.1016/0014-5793(73)80061-4  
22
- 23 Lees JA, Messa M, Sun E, Wheeler H, Torta F, Wenk MR, Camilli P, Reinisch KM. 2017a. Lipid  
24 transport by TMEM24 at ER–plasma membrane contacts regulates pulsatile insulin secretion.  
25 *Science* **355**:eaah6171. doi:10.1126/science.aah6171  
26
- 27 Lees JA, Zhang Y, Oh MS, Schauder CM, Yu X, Baskin JM, Dobbs K, Notarangelo LD, Camilli  
28 P, Walz T, Reinisch KM. 2017b. Architecture of the human PI4KIII $\alpha$  lipid kinase complex. *Proc*  
29 *Natl Acad Sci* **114**:13720–13725. doi:10.1073/pnas.1718471115  
30
- 31 LEES M, FOLCH J, STANLEY SG, CARR S. 1959. A SIMPLE PROCEDURE FOR THE  
32 PREPARATION OF BRAIN SULPHATIDES\*. *J Neurochem* **4**:9–18. doi:10.1111/j.1471-  
33 4159.1959.tb13169.x  
34
- 35 Lipsky N, Pagano R. 1985. A vital stain for the Golgi apparatus. *Science* **228**:745–747.  
36 doi:10.1126/science.2581316  
37
- 38 Luo X, Wasilko DJ, Liu Y, Sun J, Wu X, Luo Z-Q, Mao Y. 2015. Structure of the Legionella  
39 Virulence Factor, SidC Reveals a Unique PI(4)P-Specific Binding Domain Essential for Its  
40 Targeting to the Bacterial Phagosome. *PLoS Pathog* **11**:e1004965.  
41 doi:10.1371/journal.ppat.1004965  
42
- 43 Ma Y, Taylor S. 2002. A 15-Residue Bifunctional Element in d-AKAP1 Is Required for Both  
44 Endoplasmic Reticulum and Mitochondrial Targeting. *J Biol Chem* **277**:27328–27336.  
45 doi:10.1074/jbc.m201421200  
46
- 47 Martin O, Pagano R. 1987. Transbilayer movement of fluorescent analogs of phosphatidylserine  
48 and phosphatidylethanolamine at the plasma membrane of cultured cells. Evidence for a  
49 protein-mediated and ATP-dependent process(es). *J Biol Chem* **262**:5890–8.  
50
- 51 Michell RH. 2018. Do inositol supplements enhance phosphatidylinositol supply and thus



- 1 support endoplasmic reticulum function? *Br J Nutr* **120**. doi:10.1017/S0007114518000946  
2
- 3 Moser J, Gerstel B, Meyer J, Chakraborty T, Wehland J, Heinz DW. 1997. Crystal structure of  
4 the phosphatidylinositol-specific phospholipase C from the human pathogen *Listeria*  
5 *monocytogenes* 11 Edited by R. Huber. *J Mol Biol* **273**:269–282. doi:10.1006/jmbi.1997.1290  
6
- 7 Nakanishi S, Catt K, Balla T. 1995. A wortmannin-sensitive phosphatidylinositol 4-kinase that  
8 regulates hormone-sensitive pools of inositol phospholipids. *Proc Natl Acad Sci* **92**:5317–5321.  
9 doi:10.1073/pnas.92.12.5317
- 10
- 11 Nakatsu F, Messa M, Nández R, Czaplá H, Zou Y, rittmatter S, Camilli P. 2015. *Sac2/INPP5F* is  
12 an inositol 4-phosphatase that functions in the endocytic pathway. *J Cell Biol* **209**:85–95.  
13 doi:10.1083/jcb.201409064  
14
- 15 Nasuhoglu C, Feng S, Mao Y, Shammatt I, Yamamoto M, Earnest S, Lemmon M, Hilgemann  
16 DW. 2002. Modulation of cardiac PIP2 by cardioactive hormones and other physiologically  
17 relevant interventions. *American J Physiol Cell Physiol* **283**:C223–C234.  
18 doi:10.1152/ajpcell.00486.2001  
19
- 20 Olivo-Marin J-C. 2002. Extraction of spots in biological images using multiscale products.  
21 *Pattern Recogn* **35**:1989–1996. doi:10.1016/s0031-3203(01)00127-3  
22
- 23 Olkkonen VM. 2015. OSBP-Related Protein Family in Lipid Transport over Membrane Contact  
24 Sites. *Lipid insights* **8**:1–9. doi:10.4137/LPI.S31726  
25
- 26 Pagano R, Longmuir K, Martin O. 1983. Intracellular translocation and metabolism of a  
27 fluorescent phosphatidic acid analogue in cultured fibroblasts. *J Biol Chem* **258**:2034–40.  
28
- 29 Quinn KV, Behe P, Tinker A. 2008. Monitoring changes in membrane phosphatidylinositol 4,5-  
30 bisphosphate in living cells using a domain from the transcription factor tubby. *J Physiol*  
31 **586**:2855–2871. doi:10.1113/jphysiol.2008.153791  
32
- 33 Saheki Y, Bian X, Schauder CM, Sawaki Y, Surma MA, Klose C, Pincet F, Reinisch KM,  
34 DeCamilli P. 2016. Control of plasma membrane lipid homeostasis by the extended  
35 synaptotagmins. *Nat Cell Biol* **18**:504–515. doi:10.1038/ncb3339  
36
- 37 Schindelin J, Arganda-Carreras I, Frise E, Kaynig V, Longair M, Pietzsch T, Preibisch S,  
38 Rueden C, Saalfeld S, Schmid B, Tinevez J-Y, White D, Hartenstein V, Eliceiri K, Tomancak P,  
39 Cardona A. 2012. Fiji: an open-source platform for biological-image analysis. *Nat Methods*  
40 **9**:676. doi:10.1038/nmeth.2019  
41
- 42 Schmick M, Vartak N, Papke B, Kovacevic M, Truxius DC, Rossmannek L, Bastiaens PI. 2014.  
43 KRas Localizes to the Plasma Membrane by Spatial Cycles of Solubilization, Trapping and  
44 Vesicular Transport. *Cell* **157**:459–471. doi:10.1016/j.cell.2014.02.051  
45
- 46 Shaner NC, Campbell RE, Steinbach PA, Giepmans BN, Palmer AE, Tsien RY. 2004. Improved  
47 monomeric red, orange and yellow fluorescent proteins derived from *Discosoma* sp. red  
48 fluorescent protein. *Nat Biotechnol* **22**:1567–1572. doi:10.1038/nbt1037  
49
- 50 Sohn M, Korzeniowski M, Zewe JP, Wills RC, Hammond G, Humpolickova J, Vrzal L,  
51 Chalupska D, Veverka V, Fairn GD, Boura E, Balla T. 2018. PI(4,5)P2 controls plasma

- 1 membrane PI4P and PS levels via ORP5/8 recruitment to ER–PM contact sites. *J Cell Biol*  
2 *jcb.201710095*. doi:10.1083/jcb.201710095  
3
- 4 Struck D, Pagano R. 1980. Insertion of fluorescent phospholipids into the plasma membrane of  
5 a mammalian cell. *J Biol Chem* **255**:5404–10.  
6
- 7 Subach OM, Cranfill PJ, Davidson MW, Verkhusha VV. 2011. An Enhanced Monomeric Blue  
8 Fluorescent Protein with the High Chemical Stability of the Chromophore. *Plos One* **6**:e28674.  
9 doi:10.1371/journal.pone.0028674  
10
- 11 Szentpetery Z, Várnai P, Balla T. 2010. Acute manipulation of Golgi phosphoinositides to  
12 assess their importance in cellular trafficking and signaling. *Proc Natl Acad Sci* **107**:8225–8230.  
13 doi:10.1073/pnas.1000157107  
14
- 15 Ting A, Pagano R. 1990. Detection of a phosphatidylinositol-specific phospholipase C at the  
16 surface of Swiss 3T3 cells and its potential role in the regulation of cell growth. *J Biol Chem*  
17 **265**:5337–40.  
18
- 19 Traynor-Kaplan A, Kruse M, Dickson EJ, Dai G, Vivas O, Yu H, Whittington D, Hille B. 2017.  
20 Fatty-acyl chain profiles of cellular phosphoinositides. *Biochim biophys acta* **1862**:513–522.  
21 doi:10.1016/j.bbalip.2017.02.002  
22
- 23 Valm AM, Cohen S, Legant WR, Melunis J, Hershberg U, Wait E, Cohen AR, Davidson MW,  
24 Betzig E, Lippincottschwartz J. 2017. Applying systems-level spectral imaging and analysis to  
25 reveal the organelle interactome. *Nature* **546**:162–167. doi:10.1038/nature22369  
26
- 27 Vance JE. 2015. Phospholipid Synthesis and Transport in Mammalian Cells. *Traffic* **16**.  
28 doi:10.1111/tra.12230  
29
- 30 Vishwakarma RA, Vehring S, Mehta A, Sinha A, Pomorski T, Herrmann A, Menon AK. 2005.  
31 New fluorescent probes reveal that flippase-mediated flip-flop of phosphatidylinositol across the  
32 endoplasmic reticulum membrane does not depend on the stereochemistry of the lipid. *Org*  
33 *Biomol Chem* **3**:1275–1283. doi:10.1039/B500300H  
34
- 35 Wang L, Iwasaki Y, Andra KK, Pandey K, Menon AK, Bütikofer P. 2018. Scrambling of natural  
36 and fluorescently tagged phosphatidylinositol by reconstituted G protein–coupled receptor and  
37 TMEM16 scramblases. *J Biol Chem* **293**:18318–18327. doi:10.1074/jbc.RA118.004213  
38
- 39 Weber S, Wagner M, Hilbi H. 2014. Live-Cell Imaging of Phosphoinositide Dynamics and  
40 Membrane Architecture during Legionella Infection. *Mbio* **5**:e00839-13.  
41 doi:10.1128/mbio.00839-13  
42
- 43 Willars G, Nahorski S, Challiss R. 1998. Differential regulation of muscarinic acetylcholine  
44 receptor-sensitive polyphosphoinositide pools and consequences for signaling in human  
45 neuroblastoma cells. *J Biol Chem* **273**:5037–46.  
46
- 47 Yadav S, Garner K, Georgiev P, Li M, Gomez-Espinosa E, Panda A, Mathre S, Okkenhaug H,  
48 Cockcroft S, Raghu P. 2015. RDGBa, a PtdIns-PtdOH transfer protein, regulates G-protein-  
49 coupled PtdIns(4,5)P2 signalling during Drosophila phototransduction. *J Cell Sci* **128**:3330–  
50 3344. doi:10.1242/jcs.173476  
51

1 Zewe JP, Wills RC, Sangappa S, Goulden BD, Hammond GR. 2018. SAC1 degrades its lipid  
2 substrate PtdIns4P in the endoplasmic reticulum to maintain a steep chemical gradient with  
3 donor membranes. *eLife* 7. doi:10.7554/eLife.35588

4

1

| Organelle    | Is PI detected with the indicated method? |                |               | Possible reasons for discrepancy         |
|--------------|-------------------------------------------|----------------|---------------|------------------------------------------|
|              | TopFluor-PI                               | PI-PLC: PI→DAG | PI4K: PI→PI4P |                                          |
| Golgi        | <b>Yes</b>                                | <b>Yes</b>     | <b>Yes</b>    | No discrepancy                           |
| Lysosomes    | <i>Not tested</i>                         | <b>Yes</b>     | <b>Trace</b>  | PI4P phosphatase e.g. SAC2?              |
| Endosomes    | <i>Not tested</i>                         | <b>Yes</b>     | <b>Trace</b>  | PI4P phosphatase e.g. SAC2?              |
| Mitochondria | <b>Yes</b>                                | <b>Yes*</b>    | <b>Yes</b>    | No discrepancy                           |
| Peroxisomes  | <i>Not tested</i>                         | <b>Trace</b>   | <b>Yes</b>    | Failure to target PI-PLC to peroxisomes? |
| ER           | <b>Yes</b>                                | <b>Trace</b>   | <b>Yes#</b>   | Failure to target PI-PLC to ER?          |
| PM           | Not detected                              | <b>Trace#</b>  | Not detected  | PI level beneath threshold of detection? |

2 **Table 1: summary of results.** Results were characterized as “yes” when substantial and statistically significant  
3 signal was observed and “not detected” when signal was neither significant nor substantial. We use “trace” to denote  
4 situations where statistically significant but small signals ( $\Delta F/F_{pre} < 10\%$ ) were observed. “Not detected” refers to  
5 situations where no accumulation of signal was observed. Note that for TopFluor-PI, not all organelles were  
6 interrogated. \*only detected after forced targeting of PI-PLC to the mitochondrial surface. #only detected after  
7 treatment of cells with 500  $\mu$ M peroxide to inhibit endogenous PI4P phosphatase SAC1. †Only detected transiently  
8 after forced targeting of PI-PLC to the PM with a DAG sensor, and inferred by accumulation of DAG-regulated PI/PA  
9 transfer protein Nir2.

10

| Plasmid                                                           | Vector      | Insert                                                                                                                                         | Reference              |
|-------------------------------------------------------------------|-------------|------------------------------------------------------------------------------------------------------------------------------------------------|------------------------|
| <b>NES-EGFP-P4Mx1</b>                                             | pEGFP-C1    | <i>X.leavis map2k1.L(32-44):EGFP:L. pneumophila SidM(546-647)</i>                                                                              | (Sohn et al., 2018)    |
| <b>Lyn<sup>N11</sup>-FRB-iRFP</b>                                 | piRFP-N1    | <i>LYN(1-11):MTOR(2021-2113):iRFP</i>                                                                                                          | (Hammond et al., 2014) |
| <b>LAMP1-FRB-iRFP</b>                                             | piRFP-N1    | <i>LAMP1:MTOR(2021-2113):iRFP</i>                                                                                                              | (Goulden et al., 2018) |
| <b>EGFP-FYVE-EEA1</b>                                             | pEGFP-C1    | <i>EGFP:EEA1(1253-1411)</i>                                                                                                                    | (Balla et al., 2000)   |
| <b>NES-EGFP-P4Mx1</b>                                             | pEGFP-C1    | <i>X.leavis map2k1.L(32-44):EGFP:L. pneumophila SidM(546-647)</i>                                                                              | (Zewe et al., 2018)    |
| <b>mCherry-Rab5</b>                                               | pmCherry-C1 | <i>mCherry:Canis lupus RAB5A</i>                                                                                                               | (Hammond et al., 2014) |
| <b>iRFP-N1-PI-PLC<sup>C100</sup>-FRB</b>                          | piRFP-N1    | <i>L. monocytogenes PI-PLC(188-287):iGTAGPRSANS[GA]<sub>4</sub>: MTOR(2021-2113):iRFP</i>                                                      | (This study)           |
| <b>TagBFP2-C1-FKB-PI-PLC<sup>N187</sup></b>                       | pTagBFP-C1  | <i>TagBFP2:FKBP1A(3-108):[GGSA]<sub>4</sub>GG:L. monocytogenes PI-PLC(1-187)</i>                                                               | (This study)           |
| <b>pTagBFP2-C1-lyn<sup>N11</sup>-FKBP-PI-PLC<sup>N187</sup></b>   | pTagBFP-C1  | <i>LYN(1-11):RSANS[GA]<sub>4</sub>:TagBFP2: FKBP1A(3-108): [GGSA]<sub>4</sub>GG:L. monocytogenes PI-PLC(1-187)</i>                             | (This study)           |
| <b>pTagBFP2-C1-AKAP1<sup>N31</sup>-FKBP-PI-PLC<sup>N187</sup></b> | pTagBFP-C1  | <i>Mus musculus Akap1(1-31) M16L: PTRSANS[GA]<sub>4</sub>ILSRM:TagBFP2: FKBP1A(3-108): [GGSA]<sub>4</sub>GG:L. monocytogenes PI-PLC(1-187)</i> | (This study)           |
| <b>mCherry-Rab7</b>                                               | pmCherry-C1 | <i>mCherry:Canis lupus RAB7A</i>                                                                                                               | (Hammond et al., 2014) |
| <b>mCherry-FKBP-PI4KB</b>                                         | pmCherry-C1 | <i>mCherry: TagBFP2: FKBP1A(3-108): GGSA]<sub>4</sub>GG:PI4KB</i>                                                                              | (This Study)           |
| <b>mCherry-FKBP-PI4KA<sup>C1001</sup></b>                         | pmCherry-C1 | <i>mCherry: TagBFP2: FKBP1A(3-108): GGSA]<sub>4</sub>GG:PI4KA(1102-2103)</i>                                                                   | (This Study)           |
| <b>mCherry-FKBP-PI4KA<sup>C1001-D1957A</sup></b>                  | pmCherry-C1 | <i>mCherry: TagBFP2: FKBP1A(3-108): GGSA]<sub>4</sub>GG:PI4KA(1102-2103)-Asp1957Ala</i>                                                        | (This Study)           |
| <b>piRFP-FRB-Giantin</b>                                          | piRFP-C1    | <i>iRFP:MTOR(2021-2113):[GGSA]<sub>2</sub>:GOLGB1(3097-3226)</i>                                                                               | (This study)           |
| <b>pmCherry-C1ab-Prkd1</b>                                        | pmCherry-C1 | <i>mCherry:Mus musculus Prkd1(138-343)</i>                                                                                                     | (This study)           |
| <b>NES-GFP-C1ab-Prkd1</b>                                         | pEGFP-C1    | <i>EGFP:Mus musculus Prkd1(138-343)</i>                                                                                                        | (Kim et al., 2011)     |
| <b>Tubby<sub>c</sub>-mCherry</b>                                  | pEGFP-N1    | <i>Mus musculus Tub(243-505):mCherry</i>                                                                                                       | (Quinn et al., 2008)   |
| <b>Tubby<sub>c</sub><sup>R332H</sup>-mCherry</b>                  | pEGFP-N1    | <i>Mus musculus Tub(243-505) R332H:mCherry</i>                                                                                                 | (Quinn et al., 2008)   |
| <b>Akap1(31)-FRB-iRFP</b>                                         | piRFP-N1    | <i>Mus musculus Akap1(1-31) M16L:MTOR(2021-2113):iRFP</i>                                                                                      | (This study)           |
| <b>piRFP-FRB-PMP-C-10</b>                                         | piRFP-C1    | <i>iRFP: MTOR(2021-2113):[GGSA]<sub>2</sub>QASNSAVSGLRSGSSGG:PXMP(2-195)</i>                                                                   | (This study)           |
| <b>iRFP-FRB-ER</b>                                                | piRFP-C1    | <i>iRFP:MTOR(2021-2113):[GGSA]<sub>2</sub>ILNSRV:SACM1L(521-587)</i>                                                                           | (This study)           |
| <b>β4-GalT<sup>N82</sup>-mCherry</b>                              | pmCherry-N1 | <i>B4GALT(1-82):mCherry</i>                                                                                                                    | Addgene #55052*        |
| <b>iRFP-Sec61β</b>                                                | piRFP-C1    | <i>iRFP:SEC61B</i>                                                                                                                             | (Zewe et al., 2018)    |
| <b>COX8A<sup>N29x2</sup>-mCherry</b>                              | pmCherry-N1 | <i>COX8A(1-29):mCherry</i>                                                                                                                     | This study             |

|                                  |             |                                                    |                      |
|----------------------------------|-------------|----------------------------------------------------|----------------------|
| <b>MannII<sup>N21</sup>-mKO2</b> | pmKO2-N1    | <i>Mus musculus Man2a(1-102):Kusabira Orange2:</i> | Addgene #57881*      |
| <b>LAMP1-mRFP</b>                | pmRFP-N1    | <i>LAMP1:mRFP</i>                                  | (Jović et al., 2012) |
| <b>mCherry-PMP</b>               | pmCherry-C1 | mCherry:SGLRSRAQASNSAV:PXMP(2-195)                 |                      |
| <b>mCherry-VAPB</b>              | pmCherry-C1 | mCherry:VAPB                                       | (Zewe et al., 2018)  |
| <b>HAx3-AChR-M3</b>              | pcDNA3.1    | HAx3:CHRM3(2-590)                                  | J.Wes                |
| <b>EGFP-Nir2</b>                 | EGFP        | <i>EGFP:PITPNM1</i>                                | (Kim et al., 2015)   |

1 **Table 2. Plasmids used in this study.** \*B4-GalT<sup>N82</sup>-mCherry (Addgene plasmid #55052; RRID:Addgene\_55052)  
2 and MannII<sup>N21</sup>-KO2 (Addgene plasmid #57881; RRID:Addgene\_57881) were gifts from Michael Davidson.

3

## 1 Supplementary Material

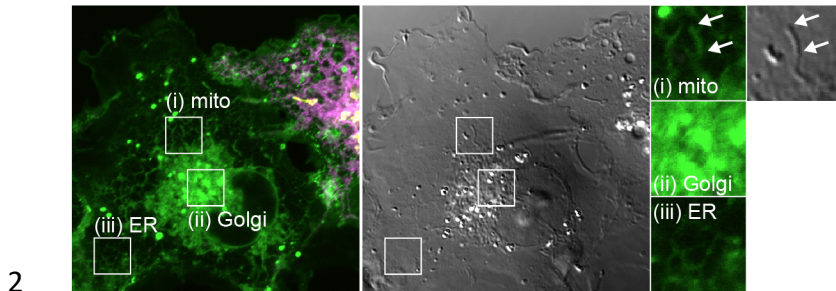

3 **Figure S1: TopFluor-PI fluorescence distribution is not contaminated by bleed-through from transfected**  
 4 **organelle markers.** Images show a non-transfected cell imaged under identical conditions to those presented in  
 5 figure 1. Clear mitochondrial (i), Golgi (ii) and ER (iii) morphology of the green fluorescence is seen even with no  
 6 expression of markers for these compartments, demonstrating that they are not due to fluorescence bleed-through.  
 7 N.B. mitochondrial morphology is evident from the differential interference contrast image (gray). Insets are 7.3  $\mu\text{m}$   
 8 and serve as scale bar.

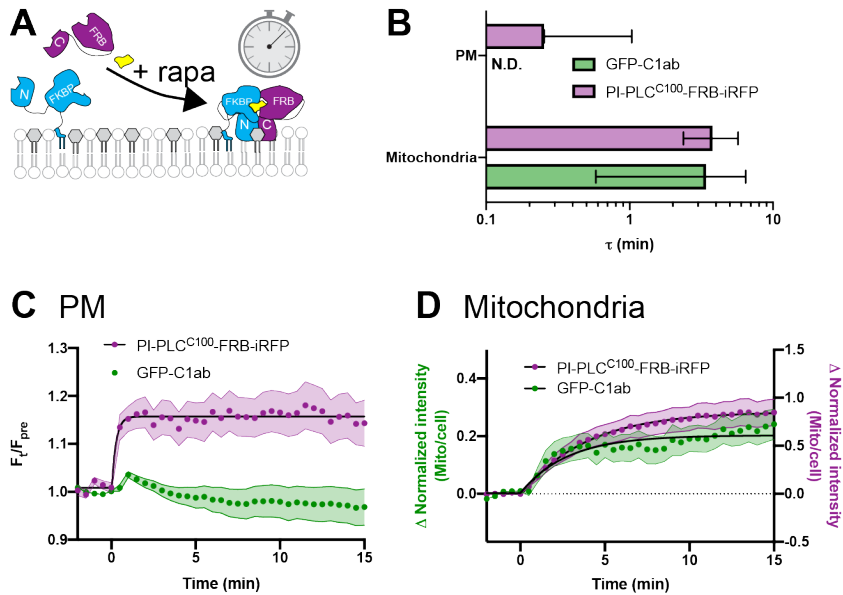

10 **Figure S2: Kinetics of PI-PLC<sup>C100</sup>-FRB-iRFP recruitment to organelle-targeted BFP-FKBP-PI-PLC<sup>N187</sup> (A)**  
 11 **schematic. (B) Summary data.** Mean time constant  $\pm$  95% confidence interval (CI) is shown for each organelle-  
 12 targeted construct. **(C and D)** Data for C1ab recruitment as shown in (C) figures 3A and (D) figure 2C is shown  
 13 alongside that for PI-PLC<sup>C100</sup>-FRB-iRFP from the same cells. Data are means with s.e.m. shaded; black fits represent  
 14 the mean fit for all cells to the single-phase exponential  $\Delta\text{Intensity} = \text{Plateau} \times e^{-(\text{time}/\tau)}$ .

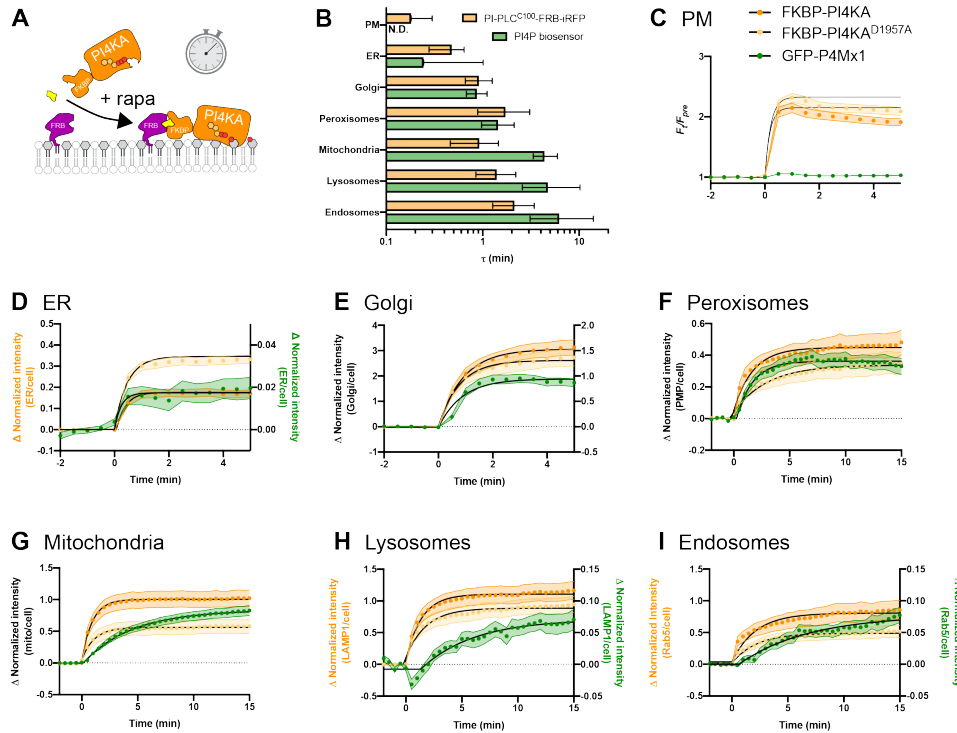

1

2 **Figure S3: Kinetics of mCherry-FKBP-PI4KA<sup>C1001</sup> recruitment to organelle-targeted FRB (A) schematic. (B)**  
 3 **Summary data.** Mean time constant  $\pm$  95% confidence interval (CI) is shown for each organelle-targeted construct.  
 4 (C-I) Data for PI4P biosensor (green) recruitment as shown in (C) figure 6A and (D-I) figure 5B is shown alongside  
 5 that for mCherry-FKBP-PI4KA<sup>C1001</sup> (orange) from the same cells. Data are means with s.e.m. shaded; black fits  
 6 represent the mean fit for all cells to the single-phase exponential  $\Delta$ Intensity = Plateau  $\times e^{-(\text{time}/\tau)}$ .

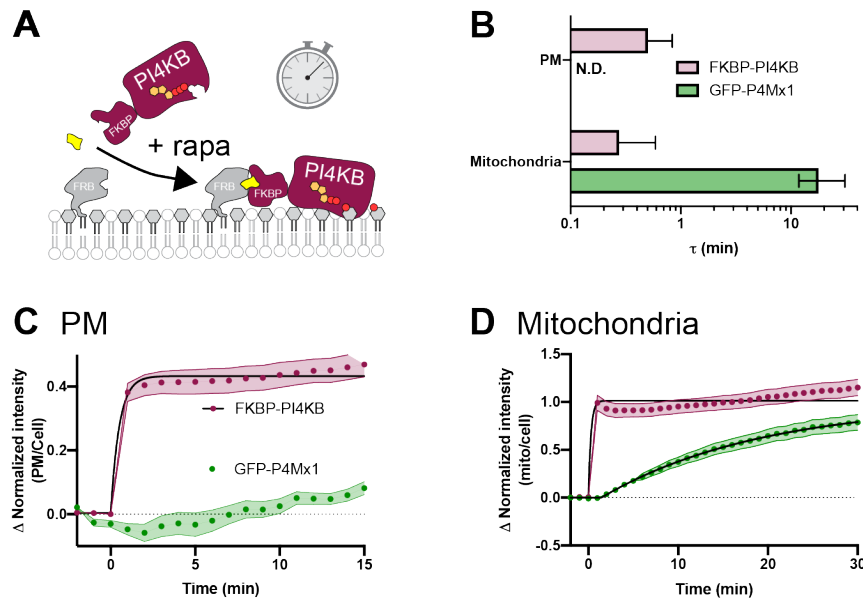

7

8 **Figure S4: Kinetics of mCherry-FKBP-PI4KB recruitment to organelle-targeted FRB (A) schematic. (B)**  
 9 **Summary data.** Mean time constant  $\pm$  95% confidence interval (CI) is shown for PM (C) and mitochondria (D). Data  
 10 for GFP-P4Mx1 PI4P biosensor (green) recruitment as shown figure 6B is shown alongside that for mCherry-FKBP-  
 11 PI4KB (maroon) from the same cells. Data are means with s.e.m. shaded; black fits represent the mean fit for all cells  
 12 to the single-phase exponential  $\Delta$ Intensity = Plateau  $\times e^{-(\text{time}/\tau)}$ .
